1 **SPINT1 regulates the aggressiveness of skin cutaneous melanoma and**  
2 **its crosstalk with tumor immune microenvironment**

3 Elena Gómez-Abenza<sup>1,2</sup>, Sofía Ibáñez-Molero<sup>1,2</sup>, Diana García Moreno<sup>1,2</sup>, Inmaculada  
4 Fuentes<sup>1,2</sup>, Leonard I. Zon<sup>3,4</sup>, Maria C. Mione<sup>5</sup>, María L. Cayuela<sup>6</sup>, Chiara Gabellini<sup>1,2,\*</sup>,  
5 Victoriano Mulero<sup>1,2,\*</sup>

6

7 <sup>1</sup>Departamento de Biología Celular e Histología, Facultad de Biología, Universidad de  
8 Murcia, Spain.

9 <sup>2</sup>Instituto Murciano de Investigación Biosanitaria (IMIB)-Arrixaca, Murcia, Spain.

10 <sup>3</sup>Department of Stem Cell and Regenerative Biology and Harvard Stem Cell Institute,  
11 Cambridge, MA, USA.

12 <sup>4</sup>Stem Cell Program and Division of Hematology/Oncology, Boston Children's Hospital  
13 and Dana-Farber Cancer Institute, Howard Hughes Medical Institute, Harvard Stem  
14 Cell Institute, Harvard Medical School, Boston, MA, USA.

15 <sup>5</sup>Laboratory of Experimental Cancer Biology, Cibio, University of Trento, Trento, Italy.

16 <sup>6</sup>Hospital Clínico Universitario Virgen de la Arrixaca, IMIB-Arrixaca, Murcia, Spain.

17 **\*Corresponding authors:**

18 **Victoriano Mulero**, Departamento de Biología Celular e Histología, Facultad de  
19 Biología, Universidad de Murcia, 30100 Murcia, Spain. Phone: +34 868 887581. Fax:  
20 +34 868 883963. e-mail: vmulero@um.es.

21 **Chiara Gabellini**, Departamento de Biología Celular e Histología, Facultad de  
22 Biología, Universidad de Murcia, 30100 Murcia, Spain. Present address: Unit of Cell  
23 and Developmental Biology, Department of Biology, University of Pisa, S.S. 12  
24 Abetone e Brennero 4, Pisa, Italy. Phone: +39 050 2211479, Fax: +39 050 2211495, e-  
25 mail chiara.gabellini@unipi.it.

26

27 **Keywords:** SPINT1, melanoma, inflammation, tumor stroma, epithelial to  
28 mesenchymal transition, metastasis, macrophages, zebrafish.

29 **Summary statement (15- 30 words)**

30 A zebrafish model shows that Spint1a deficiency facilitates oncogenic transformation,  
31 regulates the tumor/immune microenvironment crosstalk, accelerates the onset of  
32 SKCM, and promotes metastatic invasion in cell autonomous and non-autonomous  
33 manners.

34

35 **Abstract**

36 Skin cutaneous melanoma (SKCM) is the deadliest form of skin cancer and  
37 while incidence rates are declining for most cancers, they have been steadily rising for  
38 SKCM worldwide. Serine protease inhibitor, kunitz-type, 1 (SPINT1) is a type II  
39 transmembrane serine protease inhibitor that has been shown to be involved in the  
40 development of several types of cancer. We report here a high prevalence of *SPINT1*  
41 genetic alterations in SKCM patients and their association with altered tumor immune  
42 microenvironment and poor patient survival. We used the unique advantages of the  
43 zebrafish to model the impact of SPINT1 deficiency in early transformation,  
44 progression and metastatic invasion of SKCM. Our results reveal that *Spint1a*  
45 deficiency facilitates oncogenic transformation, regulates the tumor/immune  
46 microenvironment crosstalk, accelerates the onset of SKCM and promotes metastatic  
47 invasion. Notably, *Spint1a* deficiency is required at both cell autonomous and non-  
48 autonomous levels to enhance invasiveness of SKCM. These results suggest the  
49 relevance of clinical intervention on this signaling pathway for precision SKCM  
50 medicine.

51

52

53

54

## 55 **Introduction**

56 Skin cutaneous melanoma (SKCM) originates from melanocytes, neural-crest  
57 derived pigment-producing cells located in the epidermis, where their major function is  
58 to protect keratinocytes from UV-induced DNA damage (Wellbrock and Arozarena,  
59 2016). The malignant transformation of melanocytes generates this fatal form of skin  
60 cancer with a complex multigenic etiology that becomes extremely difficult to treat  
61 once it has metastasized. SKCM is the deadliest form of skin cancer (75% of deaths  
62 related to skin cancer) and it is common in the Western world. Indeed, its global  
63 incidence is 15–25 per 100,000 individuals (Schadendorf and Hauschild, 2014). While  
64 incidence rates are declining for most cancers, they have been steadily rising for SKCM  
65 worldwide (van Rooijen et al., 2017). Early detection is fundamental, since localized,  
66 early stage SKCM can be surgically excised with little chance of recurrence with a  
67 98.2% of patient survival rate after 5 year survival as reported by The Surveillance,  
68 Epidemiology, and End Results (SEER) (NIH, 2019). Metastatic SKCM, however, is  
69 still an often fatal disease with a 5-year survival rate of 15-20% (van Rooijen et al.,  
70 2017).

71 SKCM is one of the most recurrent types of cancer and its genetic heterogeneity  
72 has led in recent years to join forces to determine SKCM causes and develop effective  
73 therapies. Transformation of melanocytes into primary and then metastatic SKCM  
74 requires a complex interplay of exogenous and endogenous events (Schadendorf et al.,  
75 2015). More than 50% of the tumors originate from normal skin rather than from  
76 dysplastic nevi, suggesting that SKCM not only appears to be due to the transformation  
77 of mature melanocytes, otherwise it may arise from a malignant transformation of  
78 melanocytic progenitors (Hoerter et al., 2012) which sustain cancer development. In this  
79 way, the identification of SKCM initiating cells is really important to devising methods  
80 for early detection and eradication of SKCM (Kaufman et al., 2016; Santoriello et al.,  
81 2010). Moreover, SKCM stem cell populations have been characterized and associated  
82 with tumor progression, immunoevasion, drug resistance and metastasis (Nguyen et al.,  
83 2015).

84 Inflammation can play a key role in cancer, from initiation of the transformed  
85 phenotype to metastatic spread. Nevertheless, inflammation and cancer have a profound  
86 yet ambiguous relationship. Inflammation (especially chronic inflammation) has  
87 protumorigenic effects, but inflammatory cells also mediate an immune response

88 against the tumor and immunosuppression is known to increase the risk for certain  
89 tumors (Shalapour and Karin, 2015). Nowadays, skin cancers are also attributed to  
90 chronically injured or non-healing wounds and scars or ulcers that occur at sites of  
91 previous burns, sinuses, trauma, osteomyelitis, prolonged heat and chronic friction. The  
92 incidence of malignancy in scar tissues is 0.1–2.5 % and it is estimated that underlying  
93 infections and inflammatory responses are linked to 15–20% of all deaths from cancer  
94 worldwide (Maru et al., 2014). Furthermore, chronic inflammation contributes to about  
95 20% of all human cancers (Tang and Wang, 2016).

96 Serine protease inhibitor, kunitz-type, 1 (SPINT1), also known as hepatocyte  
97 growth factor activator inhibitor 1 (HAI1), is a type II transmembrane serine protease  
98 inhibitor that plays a crucial role in the regulation of the proteolytic activity of both  
99 suppression of tumorigenicity 14 (ST14), also known as Matriptase-1 (Benaud et al.,  
100 2001; Lin et al., 1999; Tseng et al., 2008), and Hepatocyte growth factor activator  
101 (HGFA) (Shimomura et al., 1997). The functional linkage between ST14 and SPINT1  
102 has important implications for the development of cancer. ST14 activity, which is only  
103 partially opposed by endogenous SPINT1, causes increased sensitivity to carcinogens  
104 and produces spontaneous tumorigenesis in the skin of keratin-5-matriptase transgenic  
105 mice, while increased epidermal SPINT1 expression fully counteracts the oncogenic  
106 effect of ST14 (List et al., 2005). Furthermore, the expression of ST14 has been  
107 demonstrated to be up-regulated in various human cancer histotypes such as breast,  
108 cervix, ovaries, prostate, esophagus and liver cancers (List, 2009).

109 The close functional relationship between ST14 and SPINT1 was also observed  
110 in a zebrafish model of skin inflammation, carrying a hypomorphic mutation of *spint1a*.  
111 Indeed epidermal hyperproliferation and neutrophil infiltration observed in mutant  
112 zebrafish larvae are both rescued by *st14a* gene knock-down, suggesting a novel role  
113 for the SPINT1-ST14 axis in regulating inflammation (Carney et al., 2007; Mathias et  
114 al., 2007). Given the unique advantages of the zebrafish model for *in vivo* imaging and  
115 the strong correlation between alterations of Spint1a-St14a levels with tumor  
116 progression, the *spint1a* mutant zebrafish represents an attractive model to study the  
117 role of SPINT1 and chronic inflammation in SKCM.

118 Our results support the human data that show that genetic alterations of SPINT1  
119 correlated with a poor prognosis of SKCM patients and provide evidence that SPINT1  
120 expression positively correlated with tumor macrophage infiltration, but not neutrophils.

121 In line with these clinical data, we show that Spint1a deficiency enhances at both cell  
122 autonomous and non-autonomous levels cell dissemination of SKCM in zebrafish  
123 models by promoting tumor dedifferentiation and altered immune surveillance.

124

## 125 **Results**

126

127 *SPINT1* genetic alterations are associated with poor prognosis of SKCM patients and  
128 altered tumor immune microenvironment

129 To study the impact of *SPINT1* in promoting SKCM progression and  
130 aggressiveness, an *in silico* analysis of human SKCM samples of the TCGA cohort was  
131 performed. This analysis revealed that genetic alterations occurred in 10% of SKCM  
132 patients; a relevant percentage comparing with major SKCM driven oncogenes and  
133 tumor suppressors (**Figure 1A**). Among these genetic alterations, an increased mRNA  
134 level was the most prevalent alteration (7%), while 1.9% missense mutations of  
135 unknown significance and 1.9% deep deletions were also observed. Notably, these  
136 genetic alterations of *SPINT1* significantly correlated with poor SKCM patient  
137 prognosis (**Figure 1B**) and *SPINT1* expression was significantly inhibited in human  
138 SKCM comparing with nevus and normal skin (**Figure 1C**). We next performed a GO  
139 enrichment analysis of biological process (**Figure 1D**), analyzing the differentially  
140 expressed genes in SKCM samples of the TCGA cohort with missense mutations or  
141 deep deletion of *SPINT1*. The results showed that regulation of immune system,  
142 inflammatory response, cell cycle, cell adhesion, and extracellular matrix organization  
143 represent key pathways significantly affected in human SKCM with these *SPINT1*  
144 genetic alterations. Collectively, these results point to a role for *SPINT1* in SKCM  
145 aggressiveness and its crosstalk with the tumor immune microenvironment.

146 The tumor microenvironment contains diverse leukocyte populations, including  
147 neutrophils, eosinophils, dendritic cells, macrophages, mast cells and lymphocytes  
148 (Coussens and Werb, 2002). It is known that tumor-associated macrophages (TAM) are  
149 able to interact with tumor cells and can promote cancer progression (Raposo et al.,  
150 2015). As shown in **Figure 1E**, the number of TAM in human SKCM samples  
151 correlated with the mRNA levels of *SPINT1* in metastatic SKCM. However, the number  
152 of tumor-associated neutrophils (TAN) was independent of *SPINT1* levels in both  
153 primary and metastatic SKCM. These data further confirmed the role of *SPINT1* in the

154 regulation of the crosstalk between tumor cells and inflammatory cells in human  
155 SKCM.

156

157 *The expression of SPINT1 positively correlates with both inflammation and*  
158 *macrophage markers in human SKCM biopsies*

159 In order to further understand the role of SPINT1 in SKCM, the RNA Seq  
160 database of the large TCGA cohort of SKCM was analyzed in terms of the expression  
161 of *SOX10*, *TYR* and *DCT* genes, that have been shown to be important in melanocyte  
162 development (Ordonez, 2014; Ronnstrand and Phung, 2013). In addition, *SOX10* is a  
163 recognized biomarker for the diagnosis of SKCM (Ronnstrand and Phung, 2013). It was  
164 found that *SPINT1* expression positively correlated with those of *SOX10* and *TYR*, while  
165 a negative correlation was found between the expression of *SPINT1* and *DCT* (**Figure**  
166 **2A**). The expression of the epithelial to mesenchymal transition (EMT) markers *ZEB1*,  
167 *ZEB2* and *TWIST1*, but not *TWIST2*, negatively correlated with that of *SPINT1* in  
168 SKCM (**Figure 2B**).

169 SKCM cells release several cytokines and chemokines that recruit and polarize  
170 macrophages (Wang et al., 2017). Therefore, several inflammation markers were  
171 analyzed and only the expression of the genes encoding the receptor of the pro-  
172 inflammatory cytokine TNF $\alpha$  (TNFR1) and the receptor of the pro-inflammatory  
173 chemokine interleukin 8 (CXCR2), positively correlated with *SPINT1* levels (**Figure**  
174 **2C**). Notably, the macrophage marker *MFAP4* also positively correlated with *SPINT1*  
175 expression (**Figure 2D**). However, the M2 polarization marker *CD163* (**Figure 2D**) and  
176 several interferon-stimulated genes (ISGs) (**Figure 2E**) were all unaffected by *SPINT1*  
177 levels. Collectively, these results further suggest that SPINT1 regulates SKCM  
178 differentiation and aggressiveness, and macrophages infiltration.

179

180 *Inflammation accelerates the onset of SKCM in zebrafish*

181 Given the strong correlation between alterations of *SPINT1* levels with the  
182 progression of SKCM and the crosstalk with the tumor immune microenvironment, we  
183 crossed the zebrafish line *kita:Gal4;HRAS-G12V*, which expresses the human oncogene  
184 *HRAS-G12V* in melanocytes and spontaneously develops SKCM (Santoriello et al.,  
185 2010), with the zebrafish mutant line *spint1a<sup>hi2217Tg/hi2217Tg</sup>* (Mathias et al., 2007), which  
186 presents chronic skin inflammation (**Figure 3A**). Firstly, we quantified by fluorescence

187 microscopy the number of early oncogenically transformed goblet cells, which also  
188 expressed the *kita* promoter (Feng et al., 2010), in *spint1a*-deficient larvae and their wild  
189 type siblings (**Figure 3B**). The results showed that *spint1a* deficiency resulted in  
190 increased number of HRAS-G12V<sup>+</sup> cells (**Figure 3C**). To determine if the enhanced  
191 Spint1a deficiency-driven oncogenic transformation was also able to promote SKCM  
192 aggressiveness, SKCM development in *spint1a*<sup>hi2217Tg/hi2217Tg</sup> fish were compared with  
193 wild type (*spint1a*<sup>+/hi2217Tg</sup>) from the end of metamorphosis stage (between 28-30 dpf) to  
194 120 dpf (adult stage) (**Figures 3D-3F**). The resulting Kaplan-Meier curve showed a  
195 significant decreased tumor-free rate in the Spint1a-deficient fish, which developed  
196 SKCM in more than 50% of cases at 50-60 dpf compared with their wild type siblings  
197 which reached only 75% at this age (**Figure 3F**). These data suggest that Spint1a  
198 deficiency increases oncogenic transformation and accelerates SKCM onset *in vivo*.

199

200 *Spint1a* deficiency is required at cell autonomous and non-autonomous levels to  
201 enhance SKCM cell dissemination in a zebrafish larval allotransplantation model

202 To assess the *in vivo* role of Spint1a deficiency in SKCM invasiveness, SKCM  
203 tumors from *spint1a*<sup>hi2217Tg/hi2217Tg</sup>; *kita:Gal4;HRAS-G12V* and *spint1a*<sup>+/hi2217Tg</sup>;  
204 *kita:Gal4;HRAS-G12V* were disaggregated, after staining the cells were transplanted  
205 into the yolk sac of 2 dpf casper zebrafish larvae (**Figure 4A**). The results showed that  
206 Spint1a deficiency in SKCM cells enhanced the dissemination of SKCM, assayed as the  
207 percentage of invaded larvae and the number of foci per larva, compared to control  
208 SKCM cells (**Figures 4B-4D**). We next examined whether Spint1a deficiency in the  
209 stroma, i.e. in a non-autonomous manner, also promoted SKCM aggressiveness. Spint1a  
210 wild type SKCMs were transplanted into the yolk sac of Spint1a-deficient and their wild  
211 type siblings larvae (**Figure 4E**). Strikingly, it was found that Spint1a deficiency in the  
212 tumor microenvironment also promoted a significantly higher dissemination of SKCM  
213 compared to control tumor microenvironments (**Figures 4F-4H**).

214 To further confirm a role of Spint1a in both SKCM and tumor  
215 microenvironment cells, we next sorted tumor (eGFP<sup>+</sup>) and stromal (eGFP<sup>-</sup>) cells from  
216 both genotypes and then mixed in equal proportions (~90% of tumor and ~10% of  
217 stromal cells) in the 4 possible combinations (**Figure 5A**), since it was found that all  
218 tumors had ~90% of tumor and ~10% of stromal cells (data not shown). Notably, both  
219 Spint1a-deficient tumor and stromal cells were able to increase SKCM cell invasion



220 **(Figure 5B and 5C)**. Collectively, these results suggest that Spint1a deficiency  
221 enhances SKCM invasion by both cell autonomous and non-autonomous mechanisms.

222

223 *Spint1a-deficient SKCM cells showed enhanced aggressiveness in adult zebrafish*  
224 *allotransplantation model*

225 The results obtained in allotransplantation assay in larvae prompted us to  
226 analyze the role of Spint1a in SKCM aggressiveness and metastasis in adult casper  
227 zebrafish to directly visualize tumor cell proliferation and dissemination over time.  
228 *spint1a*<sup>hi2217Tg/hi2217Tg</sup> and *spint1a*<sup>+/hi2217Tg</sup> SKCMs were sampled, disaggregated and  
229 subcutaneously injected (300,000 cells) in the dorsal sinus of adult casper recipients  
230 previously irradiated with 30 Gy **(Figure 6A)**. Tumor engraftment was visible as early  
231 as 7 days post-transplantation in both genotypes. While 90% engraftment was obtained  
232 with wild type SKCM cells, Spint1a-deficient cells showed a significant enhancement  
233 of tumor engraftment rate, around 95% **(Figure 6B)**. In addition, adult zebrafish  
234 recipients transplanted with Spint1a-deficient SKCMs developed tumors with a  
235 significant higher growth rate than those injected with wild type SKCMs **(Figures 6C)**.  
236 Notably, Spint1a-deficient SKCM cells were able to invade the entire dorsal area, part  
237 of ventral cavity and the dorsal fin **(Figures 6C)**.

238 We next performed additional transplant assays following the same work-flow  
239 but injecting an increased number of cells (500,000 cells per recipient fish), that ensured  
240 a 100 % of engraftment was for both genotypes (data not shown). From the first week of  
241 analysis, Spint1a-deficient SKCM tumor size was significantly larger than their control  
242 counterparts **(Figure 6D)**. In addition, the recipients injected with Spint1a-deficient  
243 SKCM cells developed larger tumors spanning the entire dorsal area and even exceed  
244 the notochord line and grew vertically, a clear aggressiveness signature of SKCM  
245 **(Figure 6D)**.

246 To further investigate the aggressiveness potential of Spint1a-deficient SKCMs,  
247 a serial dilution assay was performed following the work-flow previously described in  
248 **Figure S1**. Cells from both Spint1a-deficient and wild type SKCMs were serially  
249 diluted and 3 different numbers of cells (30,000 cells, 100,000 cells and 300,000 cells)  
250 were transplanted into recipients as described above. Notably, while 30,000 and  
251 100,000 Spint1a-deficient SKCM cells were able to engraft and the tumor grew over the  
252 time, wild type SKCMs hardly grew **(Figures S1A, S1B)**. However, injection of



253 300,000 *Spint1a*-deficient SKCM cells resulted in large tumor spanning the entire  
254 dorsal area and invading part of the ventral cavity (**Figure S1C**), confirming previous  
255 results. Collectively, all these results confirm that *Spint1a* deficiency enhances SKCM  
256 aggressiveness.

257

### 258 *Spint1a* deficiency promotes SKCM dedifferentiation and inflammation

259 To understand the mechanisms involved in the *Spint1a*-mediated aggressiveness  
260 of SKCM, the expression of genes encoding important biomarkers was analyzed by RT-  
261 qPCR. The mRNA levels of *sox10*, *tyr*, *dct* and *mitfa* were lower in *Spint1a*-deficient  
262 SKCMs than in their wild type counterparts (**Figure S2**). In addition, while the  
263 transcript levels of *mmp9* and *slug* were similar in *Spint1a*-deficient and wild type  
264 SKCM, *cdh1* levels were significantly decreased in *Spint1a*-deficient compared to wild  
265 type SKCM (**Figure S2**).

266 We next analyzed genes encoding key inflammatory molecules and immune cell  
267 markers, including the pro-inflammatory cytokine *Il1b*, the neutrophil markers *Lyz* and  
268 *Mpx*, the macrophage marker *Mpeg1*, and the ISGs *B2m*, *Mxb* and *Pkz*, in *Spint1a*-  
269 deficient and wild type SKCMs (**Figure S2**). Curiously, it was found that while *il1b*, *lyz*  
270 and *mpx* mRNA levels were not affected by *Spint1a* deficiency, those of *mpeg1* were  
271 elevated in *Spint1a*-deficient SKCMs. Furthermore, the ISGs *b2m*, *mxh* and *pkz* genes  
272 showed enhanced mRNA levels in *Spint1a*-deficient SKCMs. These results point out to  
273 altered immune surveillance and tumor cell dedifferentiation promoted by *Spint1a*-  
274 deficiency in SKCM.

275

## 276 **Discussion**

277 The relationships between inflammation and cancer are ambiguous. Although it  
278 is estimated that underlying infections and inflammatory responses are linked to 15–  
279 20% of all deaths from cancer worldwide (Maru et al., 2014), immunosuppression is  
280 known to increase the risk for certain tumors (Shalapour and Karin, 2015). Furthermore,  
281 immunotherapy is considered the most promising cancer therapy for the next future  
282 (Carreau and Pavlick, 2019). In this study, we have developed a preclinical zebrafish  
283 model to study the role of SPINT1-driven skin chronic inflammation in melanoma. We  
284 found that *Spint1a* deficiency is required at both cell autonomous and non-autonomous  
285 levels to enhance cell dissemination of SKCM by promoting tumor dedifferentiation

286 and altered immune surveillance. These results may have important clinical impact,  
287 since genetic alterations of SPINT1 were found in 10% of SKCM patients and  
288 correlated with altered cell cycle, differentiation and innate and adaptive immune  
289 signaling pathways and, more importantly, with a poor prognosis. In addition, *SPINT1*  
290 transcript levels positively correlated with macrophage infiltration, but not neutrophil  
291 one, in SKCM tumor samples. Curiously, activated neutrophils in a condition of  
292 repeated wounding have been shown to interact with pre-neoplastic cells promoting  
293 their proliferation through the release of prostaglandin E2 and, more importantly,  
294 SKCM ulceration correlates with increased neutrophil infiltration and tumor cell  
295 proliferation, which are both associated with poor prognosis (Antonio et al., 2015).  
296 Although we found a robust positive correlation between the transcript levels of *SPINT1*  
297 and *CXCR2*, which encodes a major IL-8 receptor involved in SKCM neutrophil  
298 infiltration (Jablonska et al., 2014), *CXCR2* has also been shown to promote tumor-  
299 induced angiogenesis and increased proliferation (Gabellini et al., 2018; Gabellini et al.,  
300 2009; Singh et al., 2009) and, therefore, the SPINT1/*CXCR2* axis may regulate SKCM  
301 aggressiveness by neutrophil-independent pathways.

302 The zebrafish model developed in this study uncovered a role for Spint1a in  
303 facilitating oncogenic transformation which probably accelerates the SKCM onset.  
304 Although SPINT1 is a serine protease inhibitor with several targets, including ST14 and  
305 HGFA, deregulation of the SPINT1/ST14 axis leads to spontaneous squamous cell  
306 carcinoma in mice (List et al., 2005) and keratinocyte hyperproliferation in zebrafish  
307 (Carney et al., 2007; Mathias et al., 2007) preceded by skin inflammation in both  
308 models. In addition, intestine-specific Spint1 deletion in mice induces the activation of  
309 the master inflammation transcription factor NF- $\kappa$ B and accelerated intestinal tumor  
310 formation (Kawaguchi et al., 2016). Strikingly, pharmacological inhibition of NF- $\kappa$ B  
311 activation reduces the formation of intestinal tumors in Spint1-deficient ApcMin/+  
312 mice (Kawaguchi et al., 2016), unequivocally demonstrating that Spint1-driven  
313 inflammation promotes tumorigenesis.

314 The SKCM allotransplant assays in larvae revealed for the first time that Spint1a  
315 deficiency in both tumor and stromal cells increases SKCM invasiveness. In addition,  
316 Spint1a deficiency in both cell types does not show enhanced invasiveness compared to  
317 Spint1a deficiency in either cell type. This is an interesting observation, since SPINT1  
318 is a membrane-bound protein that may, therefore, inhibit their targets in both tumor cell

319 autonomous and non-autonomous manners. However, wild type *Spint1a* tumor  
320 microenvironment fails to compensate its loss in tumor cells, since *Spint1a*-deficient  
321 tumor cells show enhanced invasiveness in wild type larvae and adult recipients, and  
322 vice versa. Importantly, transplantation experiments of serial diluted SKCM cells  
323 revealed the crucial cell-autonomous role of *Spint1a* in inhibiting tumor aggressiveness.  
324 Similarly, loss of SPINT1 in human pancreatic cancer cells promotes ST14-dependent  
325 metastasis in nude mouse orthotopic xenograft models (Ye et al., 2014). We observed  
326 that genetic alterations in *SPINT1* transcript levels in SKCM patient samples negatively  
327 correlated with EMT markers and that *Spint1a*-deficient zebrafish SKCM showed  
328 reduced *cdh1* mRNA levels. EMT phenotype switching has been shown to be involved  
329 in acquisition of metastatic properties in the vertical growth phase of SKCM (Bennett,  
330 2008) and loss of E-cadherin, with gain of N-cadherin and osteonectin, was associated  
331 with SKCM metastasis (Alonso et al., 2007). Importantly, the presence of aberrant E-  
332 cadherin expression in primary and metastatic SKCM is associated with a poor overall  
333 patient survival (Yan et al., 2016). Therefore, our results suggest that SPINT1 loss may  
334 facilitate metastatic invasion of human SKCM through EMT phenotype switching.

335 In summary, we have developed a preclinical model to study the role of altered  
336 expression of SPINT1 in early transformation, progression and metastatic invasion in  
337 SKCM. This model has revealed that *Spint1a* deficiency facilitates oncogenic  
338 transformation, regulates the tumor/immune microenvironment crosstalk and is  
339 associated to SKCM aggressiveness. In addition, *Spint1a* deficiency in either tumor or  
340 microenvironment compartment increases SKCM aggressiveness. The high prevalence  
341 of *SPINT1* genetic alterations in SKCM patients and their association with a poor  
342 prognosis, suggest the relevance of clinical intervention on this signaling pathway for  
343 precision SKCM medicine.

344

## 345 **Materials and Methods**

346

### 347 *Animals*

348 The experiments complied with the Guidelines of the European Union Council  
349 (Directive 2010/63/EU) and the Spanish RD 53/2013. Experiments and procedures were  
350 performed as approved by the Consejería de Agua, Agricultura, Ganadería y Pesca de la  
351 CARM (authorization number # A13180602).

352 Wild-type zebrafish (*Danio rerio* H. Cypriniformes, Cyprinidae) were obtained  
353 from the Zebrafish International Resource Center (ZIRC, Oregon, USA) and mated,  
354 staged, raised and processed as described in the zebrafish handbook (Westerfield, 2000).  
355 Zebrafish fertilized eggs were obtained from natural spawning of wild type and  
356 transgenic fish held at our facilities following standard husbandry practices. Animals  
357 were maintained in a 12 h light/dark cycle at 28°C. *Tg(kita:GalTA4,UAS:mCherry)<sup>hzm1</sup>*  
358 zebrafish were crossed with *Tg(UAS:eGFP-H-RAS\_G12V)<sup>io6</sup>* line (Santoriello et al.,  
359 2010) to express oncogenic human HRAS\_G12V driven by the melanocyte cell-specific  
360 promoter *kita*. The hi2217 line, which carries a hypomorphic *spint1a* mutant allele that  
361 promotes skin inflammation (Mathias et al., 2007), and transparent *roy<sup>a9/a9</sup>; nacre<sup>w2/w2</sup>*  
362 (*casper*)(White et al., 2008) of 4-8 month old were previously described.

363 Zebrafish larvae were anesthetized by a solution of 0.16 mg/ml buffered tricaine  
364 (Sigma-Aldrich) in embryo medium. Adult zebrafish were anesthetized by a dual  
365 anesthetic protocol to minimize over-exposure to tricaine, in long-term studies (up to 40  
366 min) (Dang et al., 2016). Briefly, the anesthesia was firstly induced by tricaine and then  
367 fish were transferred to tricaine/isoflurane solution (forane in ethanol, 1:9).

368

#### 369 *Tumor sampling, disaggregation and cell sorting*

370 Primary melanoma tumors were excised from adult zebrafish once they had  
371 reached between 3-5 mm in diameter. Some individuals were euthanized according the  
372 European Union Council and IUAC protocol and others were monitored and maintained  
373 still alive after the tumor biopsy treated with conditioners to reduce fish stress and heal  
374 damaged tissue and wounds (STRESS COAT, API), as well as to protect from bacterial  
375 (MELAFIX, API) and fungal infections (PIMAFIX, API).

376 The tumor was excised with a clean scalpel and razor blade, placed in 2 ml of  
377 dissection media, composed by DMEM/F12 (Life Technologies), 100 UI/ml penicillin,  
378 100 µg/ml streptomycin, 0.075 mg/ml Liberase (Roche). After manually disaggregation  
379 with a clean razor blade and incubation at room temperature for 30 min, 5 ml of wash  
380 media, composed by DMEM/F12 (Life Technologies), penicillin-streptomycin (Life  
381 Technologies), and 15% heat-inactivated FBS (Life Technologies), were added to the  
382 tumor slurry and manually disaggregated one last time. Next, the tumor cell suspensions  
383 were passed through a 40 µm filter (BD) into a clean 50 ml tube. An additional 5 ml of  
384 wash media was added to the initial tumor slurry and additionally filtered. This

385 procedure was repeated twice. Cells were counted with a hemocytometer and the tubes  
386 of resuspended cells were centrifuged at 500 g for 5 min. The pellets of tumor cells  
387 were resuspended in PBS containing 5% FBS and kept on ice prior to transplantation  
388 (Dang et al., 2016).

389 The resulting cell suspension from zebrafish melanoma tumors was passed  
390 through a 40  $\mu$ m cell strainer and propidium iodide (PI) was used as a vital dye to  
391 exclude dead cells. The Cell Sorting was performed on a "Cell Sorter" SONY SH800Z  
392 in which eGFP positive cells were sorted from the negative ones of the same cell tumor  
393 suspension.

#### 394 *Larval allotransplantation assays*

395 Melanomas were disaggregated, then labelled with 1,1'-di-octa-decyl-3,3',3'-  
396 tetra-methyl-indo-carbo-cya-nine perchlorate (DiI, ThermoFisher) and finally  
397 resuspended in a buffer containing 5% FBS in PBS. Between 25 to 50 cells/embryo  
398 were then injected in the yolk sac of Casper or *spint1* mutants zebrafish larvae 48 hours  
399 post-fertilization (hpf) and after 5 days at 28°C, larvae were analyzed for zebrafish  
400 melanoma cells dissemination by fluorescence microscopy (Marques et al., 2009).  
401 Melanoma cell invasion score was calculated as the percentage of zebrafish melanoma  
402 cell-invaded larvae over the total number of larvae analyzed taking into account also the  
403 number of tumor foci per larvae. Three tumor foci were established to score a larva as  
404 positive for invasion. Furthermore, larvae positive for invasion were also distinguished  
405 in three groups considering the number of positive foci per larvae: 3-5 foci per larvae, 5-  
406 15 foci per larvae and >15 foci per larvae.

407

#### 408 *Adult allotransplantation assays*

409 Adult zebrafish used as transplant recipients were immunosuppressed to prevent  
410 rejection of the donor material. Thus, the recipients were anesthetized, using the dual  
411 anesthetic protocol described above, and treated with 30 Gy of split dose sub-lethal X-  
412 irradiation (YXLON SMART 200E, 200 kV, 4.5 mA) two days before the  
413 transplantation. Then the immunosuppressed fish were maintained in fresh fish water  
414 treated with conditioners preventing infections onset and the consequent recipient  
415 deaths.

416 Anesthetized fish were placed dorsal side up on a damp sponge and stabilized  
417 with one hand. Using the other hand, the needle of a 10  $\mu$ l beveled, 26S-gauged syringe

418 (Hamilton) was positioned midline and ahead to the dorsal fin. 30,000, 100,000,  
419 300,000 and 500,000 cells resuspended in PBS were injected into the dorsal  
420 subcutaneous cavity. The syringe was washed in 70% ethanol and rinsed with PBS  
421 between uses. Following transplantation, fish were placed into a recovery tank of fresh  
422 fish water and kept off-flow with daily water changes for 7 days. Large and pigmented  
423 tumors engrafted and were observed to expand by 10 days post-transplantation.

424

#### 425 *SKCM imaging in adult zebrafish*

426 Adult zebrafish were scored weekly for melanoma formation starting at the first  
427 appearance of raised lesions. Tumor scoring was blinded and experiments were  
428 independently repeated at least 3 times. Zebrafish were anesthetized, placed in a dish of  
429 fish water and photographed using a mounted camera (Nikon D3100 with a Nikon AF-S  
430 Micro Lens). The pigmented tumor size was represented as the number of pigmented  
431 pixels (Adobe Photoshop CS5).

432

#### 433 *Analysis of gene expression*

434 Once zebrafish tumors reached between 3-5 mm of diameter, they were excised  
435 and total RNA was extracted with TRIzol reagent (Invitrogen), following the  
436 manufacturer's instructions, and then treated with DNase I, amplification grade (1 U/ $\mu$ g  
437 RNA; Invitrogen). SuperScript III RNase H<sup>-</sup> Reverse Transcriptase (Invitrogen) was  
438 used to synthesize first-strand cDNA with oligo(dT)<sub>18</sub> primer from 1  $\mu$ g of total RNA at  
439 50°C for 50 min. Real-time PCR was performed with an ABI PRISM 7500 instrument  
440 (Applied Biosystems) using SYBR Green PCR Core Reagents (Applied Biosystems).  
441 Reaction mixtures were incubated for 10 min at 95°C, followed by 40 cycles of 15 s at  
442 95°C, 1 min at 60°C, and finally 15 s at 95°C, 1 min 60°C and 15 s at 95°C. For each  
443 mRNA, gene expression was normalized to the ribosomal protein S11 (rps11) content in  
444 each sample Pfaffl method (Pfaffl, 2001). The primers used are shown in Table S1. In  
445 all cases, each PCR was performed with triplicate samples and repeated at least in two  
446 independent samples.

447

#### 448 *Human SKCM dataset analysis*

449 Normalized gene expression, patient survival data, genetic alterations and  
450 neutrophil/macrophage infiltration were downloaded from SKCM repository of The



451 Cancer Genome Atlas (TCGA, Provisional) from cBioPortal database  
452 (<https://www.cbioportal.org/>). Transcript levels of *SPINT1* in human samples from  
453 normal skin, benign and malignant melanoma was collected from Gene Expression  
454 Omnibus (GDS1375 dataset and 202826\_at probe). Gene expression plots and  
455 regression curves for correlation studies were obtained using GraphPad Prism 5.03  
456 (GraphPad Software).

457

#### 458 *Statistical analysis*

459 Data are shown as mean  $\pm$  SEM and they were analyzed by analysis of variance  
460 (ANOVA) and a Tukey multiple range test to determine differences between groups.  
461 The survival curves were analysed using the log-rank (Mantel-Cox) test. All the  
462 experiments were performed at least three times, unless otherwise indicated. The sample  
463 size for each treatment is indicated in the graph and/or in the figure legend. Statistical  
464 significance was defined as  $p < 0.05$ .

465

#### 466 **Acknowledgments**

467 We strongly acknowledge P. Martínez for his excellent technical assistance with  
468 zebrafish maintenance.

469

#### 470 **Funding**

471 This work was supported by the Spanish Ministry of Science, Innovation and  
472 Universities (grants BIO2014-52655-R and BIO2017-84702-R to VM and PI13/0234 to  
473 MLC), all co-funded with Fondos Europeos de Desarrollo Regional/European Regional  
474 Development Funds), Fundación Séneca-Murcia (grant 19400/PI/14 to MLC), the  
475 University of Murcia (postdoctoral contracts to DGM), and the European Union  
476 Seventh Framework Programme-Marie Curie COFUND (FP7/2007-2013) under UMU  
477 Incoming Mobility Programme ACTION (U-IMPACT) Grant Agreement 267143. The  
478 funders had no role in study design, data collection and analysis, decision to publish, or  
479 preparation of the manuscript.

480

#### 481 **Author contributions**

482 VM conceived the study; EGA, LIZ, CG and VM designed research; EGA, SIM,  
483 DGM, IF and CG performed research; EGA, SIM, DGM, IF, LIZ, MCM, MLC, CG and



484 VM analyzed data; and EGA, CG and VM wrote the manuscript with minor  
485 contribution from other authors.

486

487 **Conflict of interest**

488 L.I.Z. is a founder and stockholder of Fate Therapeutics, Inc., Scholar Rock and  
489 Camp4 Therapeutics.

490

## 491 **References**

492

493 **Alonso, S. R., Tracey, L., Ortiz, P., Perez-Gomez, B., Palacios, J., Pollan, M., Linares, J.,**  
494 **Serrano, S., Saez-Castillo, A. I., Sanchez, L. et al.** (2007). A high-throughput study in melanoma  
495 identifies epithelial-mesenchymal transition as a major determinant of metastasis. *Cancer Res*  
496 **67**, 3450-60.

497 **Antonio, N., Bonnelykke-Behrndtz, M. L., Ward, L. C., Collin, J., Christensen, I. J.,**  
498 **Steiniche, T., Schmidt, H., Feng, Y. and Martin, P.** (2015). The wound inflammatory response  
499 exacerbates growth of pre-neoplastic cells and progression to cancer. *EMBO J* **34**, 2219-36.

500 **Benaud, C., Dickson, R. B. and Lin, C. Y.** (2001). Regulation of the activity of matriptase  
501 on epithelial cell surfaces by a blood-derived factor. *Eur J Biochem* **268**, 1439-47.

502 **Bennett, D. C.** (2008). How to make a melanoma: what do we know of the primary  
503 clonal events? *Pigment Cell Melanoma Res* **21**, 27-38.

504 **Carney, T. J., von der Hardt, S., Sonntag, C., Amsterdam, A., Topczewski, J., Hopkins,**  
505 **N. and Hammerschmidt, M.** (2007). Inactivation of serine protease Matriptase1a by its  
506 inhibitor Hai1 is required for epithelial integrity of the zebrafish epidermis. *Development* **134**,  
507 3461-71.

508 **Carreau, N. and Pavlick, A.** (2019). Revolutionizing treatment of advanced melanoma  
509 with immunotherapy. *Surg Oncol*.

510 **Coussens, L. M. and Werb, Z.** (2002). Inflammation and cancer. *Nature* **420**, 860-7.

511 **Dang, M., Henderson, R. E., Garraway, L. A. and Zon, L. I.** (2016). Long-term drug  
512 administration in the adult zebrafish using oral gavage for cancer preclinical studies. *Dis Model*  
513 *Mech* **9**, 811-20.

514 **Feng, Y., Santoriello, C., Mione, M., Hurlstone, A. and Martin, P.** (2010). Live imaging  
515 of innate immune cell sensing of transformed cells in zebrafish larvae: parallels between tumor  
516 initiation and wound inflammation. *PLoS Biol* **8**, e1000562.

517 **Gabellini, C., Gomez-Abenza, E., Ibanez-Molero, S., Tupone, M. G., Perez-Oliva, A. B.,**  
518 **de Oliveira, S., Del Bufalo, D. and Mulero, V.** (2018). Interleukin 8 mediates bcl-xL-induced  
519 enhancement of human melanoma cell dissemination and angiogenesis in a zebrafish  
520 xenograft model. *Int J Cancer* **142**, 584-596.

521 **Gabellini, C., Trisciuglio, D., Desideri, M., Candiloro, A., Ragazzoni, Y., Orlandi, A.,**  
522 **Zupi, G. and Del Bufalo, D.** (2009). Functional activity of CXCL8 receptors, CXCR1 and CXCR2,  
523 on human malignant melanoma progression. *Eur J Cancer* **45**, 2618-27.

524 **Hoerter, J. D., Bradley, P., Casillas, A., Chambers, D., Weiswasser, B., Clements, L.,**  
525 **Gilbert, S. and Jiao, A.** (2012). Does melanoma begin in a melanocyte stem cell? *J Skin Cancer*  
526 **2012**, 571087.

527 **Jablonska, J., Wu, C. F., Andzinski, L., Leschner, S. and Weiss, S.** (2014). CXCR2-  
528 mediated tumor-associated neutrophil recruitment is regulated by IFN-beta. *Int J Cancer* **134**,  
529 1346-58.

530 **Kaufman, C. K., Mosimann, C., Fan, Z. P., Yang, S., Thomas, A. J., Ablain, J., Tan, J. L.,**  
531 **Fogley, R. D., van Rooijen, E., Hagedorn, E. J. et al.** (2016). A zebrafish melanoma model  
532 reveals emergence of neural crest identity during melanoma initiation. *Science* **351**, aad2197.

533 **Kawaguchi, M., Yamamoto, K., Kanemaru, A., Tanaka, H., Umezawa, K., Fukushima,**  
534 **T. and Kataoka, H.** (2016). Inhibition of nuclear factor-kappaB signaling suppresses Spint1-  
535 deletion-induced tumor susceptibility in the ApcMin/+ model. *Oncotarget* **7**, 68614-68622.

536 **Lin, C. Y., Anders, J., Johnson, M., Sang, Q. A. and Dickson, R. B.** (1999). Molecular  
537 cloning of cDNA for matriptase, a matrix-degrading serine protease with trypsin-like activity. *J*  
538 *Biol Chem* **274**, 18231-6.

539 **List, K.** (2009). Matriptase: a culprit in cancer? *Future Oncol* **5**, 97-104.

- 540 **List, K., Szabo, R., Molinolo, A., Sriuranpong, V., Redeye, V., Murdock, T., Burke, B.,**  
541 **Nielsen, B. S., Gutkind, J. S. and Bugge, T. H.** (2005). Deregulated matriptase causes ras-  
542 independent multistage carcinogenesis and promotes ras-mediated malignant transformation.  
543 *Genes Dev* **19**, 1934-50.
- 544 **Marques, I. J., Weiss, F. U., Vlecken, D. H., Nitsche, C., Bakkers, J., Lagendijk, A. K.,**  
545 **Partecke, L. I., Heidecke, C. D., Lerch, M. M. and Bagowski, C. P.** (2009). Metastatic behaviour  
546 of primary human tumours in a zebrafish xenotransplantation model. *BMC Cancer* **9**, 128.
- 547 **Maru, G. B., Gandhi, K., Ramchandani, A. and Kumar, G.** (2014). The role of  
548 inflammation in skin cancer. *Adv Exp Med Biol* **816**, 437-69.
- 549 **Mathias, J. R., Dodd, M. E., Walters, K. B., Rhodes, J., Kanki, J. P., Look, A. T. and**  
550 **Huttenlocher, A.** (2007). Live imaging of chronic inflammation caused by mutation of zebrafish  
551 Hai1. *J Cell Sci* **120**, 3372-83.
- 552 **Nguyen, N., Coutts, K. L., Luo, Y. and Fujita, M.** (2015). Understanding melanoma stem  
553 cells. *Melanoma Manag* **2**, 179-188.
- 554 **NIH.** (2019). Cancer Stat Facts: Melanoma of the Skin, vol. 2019.  
555 <https://seer.cancer.gov/statfacts/html/melan.html>: National Cancer Institute.
- 556 **Ordonez, N. G.** (2014). Value of melanocytic-associated immunohistochemical markers  
557 in the diagnosis of malignant melanoma: a review and update. *Hum Pathol* **45**, 191-205.
- 558 **Pfaffl, M. W.** (2001). A new mathematical model for relative quantification in real-time  
559 RT-PCR. *Nucleic Acids Res* **29**, e45.
- 560 **Raposo, T. P., Beirao, B. C., Pang, L. Y., Queiroga, F. L. and Argyle, D. J.** (2015).  
561 Inflammation and cancer: till death tears them apart. *Vet J* **205**, 161-74.
- 562 **Ronnstrand, L. and Phung, B.** (2013). Enhanced SOX10 and KIT expression in  
563 cutaneous melanoma. *Med Oncol* **30**, 648.
- 564 **Santoriello, C., Gennaro, E., Anelli, V., Distel, M., Kelly, A., Koster, R. W., Hurlstone,**  
565 **A. and Mione, M.** (2010). Kita driven expression of oncogenic HRAS leads to early onset and  
566 highly penetrant melanoma in zebrafish. *PLoS One* **5**, e15170.
- 567 **Schadendorf, D., Fisher, D. E., Garbe, C., Gershenwald, J. E., Grob, J. J., Halpern, A.,**  
568 **Herlyn, M., Marchetti, M. A., McArthur, G., Ribas, A. et al.** (2015). Melanoma. *Nat Rev Dis*  
569 *Primers* **1**, 15003.
- 570 **Schadendorf, D. and Hauschild, A.** (2014). Melanoma in 2013: Melanoma--the run of  
571 success continues. *Nat Rev Clin Oncol* **11**, 75-6.
- 572 **Shalapour, S. and Karin, M.** (2015). Immunity, inflammation, and cancer: an eternal  
573 fight between good and evil. *J Clin Invest* **125**, 3347-55.
- 574 **Shimomura, T., Denda, K., Kitamura, A., Kawaguchi, T., Kito, M., Kondo, J., Kagaya,**  
575 **S., Qin, L., Takata, H., Miyazawa, K. et al.** (1997). Hepatocyte growth factor activator inhibitor,  
576 a novel Kunitz-type serine protease inhibitor. *J Biol Chem* **272**, 6370-6.
- 577 **Singh, S., Sadanandam, A., Nannuru, K. C., Varney, M. L., Mayer-Ezell, R., Bond, R.**  
578 **and Singh, R. K.** (2009). Small-molecule antagonists for CXCR2 and CXCR1 inhibit human  
579 melanoma growth by decreasing tumor cell proliferation, survival, and angiogenesis. *Clin*  
580 *Cancer Res* **15**, 2380-6.
- 581 **Tang, L. and Wang, K.** (2016). Chronic Inflammation in Skin Malignancies. *Journal of*  
582 *Molecular Signaling* **11**, 2.
- 583 **Tseng, I. C., Chou, F. P., Su, S. F., Oberst, M., Madayiputhiya, N., Lee, M. S., Wang, J.**  
584 **K., Sloane, D. E., Johnson, M. and Lin, C. Y.** (2008). Purification from human milk of matriptase  
585 complexes with secreted serpins: mechanism for inhibition of matriptase other than HAI-1. *Am*  
586 *J Physiol Cell Physiol* **295**, C423-31.
- 587 **van Rooijen, E., Fazio, M. and Zon, L. I.** (2017). From fish bowl to bedside: The power  
588 of zebrafish to unravel melanoma pathogenesis and discover new therapeutics. *Pigment Cell*  
589 *Melanoma Res.*

590           **Wang, H., Yang, L., Wang, D., Zhang, Q. and Zhang, L.** (2017). Pro-tumor activities of  
591 macrophages in the progression of melanoma. *Hum Vaccin Immunother* **13**, 1556-1562.  
592           **Wellbrock, C. and Arozarena, I.** (2016). The Complexity of the ERK/MAP-Kinase  
593 Pathway and the Treatment of Melanoma Skin Cancer. *Front Cell Dev Biol* **4**, 33.  
594           **Westerfield, M.** (2000). The Zebrafish Book. A Guide for the Laboratory Use of  
595 Zebrafish *Danio\** (Brachydanio) rerio. . Eugene, OR.: University of Oregon Press.  
596           **White, R. M., Sessa, A., Burke, C., Bowman, T., LeBlanc, J., Ceol, C., Bourque, C.,**  
597 **Dovey, M., Goessling, W., Burns, C. E. et al.** (2008). Transparent adult zebrafish as a tool for in  
598 vivo transplantation analysis. *Cell Stem Cell* **2**, 183-9.  
599           **Yan, S., Holderness, B. M., Li, Z., Seidel, G. D., Gui, J., Fisher, J. L. and Ernstoff, M. S.**  
600 (2016). Epithelial-Mesenchymal Expression Phenotype of Primary Melanoma and Matched  
601 Metastases and Relationship with Overall Survival. *Anticancer Res* **36**, 6449-6456.  
602           **Ye, J., Kawaguchi, M., Haruyama, Y., Kanemaru, A., Fukushima, T., Yamamoto, K.,**  
603 **Lin, C. Y. and Kataoka, H.** (2014). Loss of hepatocyte growth factor activator inhibitor type 1  
604 participates in metastatic spreading of human pancreatic cancer cells in a mouse orthotopic  
605 transplantation model. *Cancer Sci* **105**, 44-51.

606

607

## 608 **Figure Legends**

609

610 **Figure 1: SPINT1 genetic alterations are associated with poor prognosis of SKCM**  
611 **patients. (A)** Percentage of genetic alterations in oncogenes, tumor suppressor genes  
612 and *SPINT1* in SKCM patients of the TCGA cohort (n=479). **(B)** Survival curve of  
613 patients with genetic alteration (increased mRNA level, missense mutations and deep  
614 deletions) vs. wild type *SPINT1* of SKCM of the TCGA cohort. Kaplan–Meier Gehan-  
615 Breslow-Wilcoxon and nonparametric Log-rank Test. **(C)** Genetic expression of  
616 *SPINT1* in human samples from normal skin, nevus and malignant melanoma from  
617 GEO data set GDS1375 and 202826\_at probe (n=70). \*\*\*p<0.001 according to  
618 ANOVA and Tukey's Multiple Comparison Test. **(D)** Enrichment analysis of GO  
619 biological process. Representation of the most significant GO biological process altered  
620 when *SPINT1* is affected by missense mutations or deep deletion. Analysis Type:  
621 PANTHER Overrepresentation Test (Released 05/12/2017), Test Type: FISHER. **(E)**  
622 Number of infiltrated macrophages and neutrophils in SKCM samples of the TCGA  
623 cohort (n=479). The number of infiltrated cells in SKCM samples with low (blue) or  
624 high (red) *SPINT1* mRNA levels according to the median. The mean ± S.E.M. for each  
625 group is shown. \*p<0.05; \*\*p<0.01 according to Student *t* Tests.

626

627 **Figure 2. SPINT1 expression correlates with aggressiveness marker expression in**  
628 **human SKCM biopsies.** Correlation of *SPINT1* gene expression with those of the  
629 melanocyte differentiation markers *SOX10*, *TYR* and *DCT* **(A)** and the EMT markers  
630 *ZEB1*, *ZEB2*, *TWIST1* and *TWIST2* **(B)**, the inflammation markers *TNFA*, *TNFR1*,  
631 *TNFR2*, *IL8* (*CXCL8*), *CXCR2*, *IL6* and *IL6R* **(C)**, the macrophage markers *MFAP4* and  
632 *CD163* **(D)** and the interferon markers *ISG15* and *IFIT1* **(E)** in human SKCM biopsies  
633 of the TCGA cohort. The statistical significance of the correlation was determined using  
634 Pearson's correlation coefficient. A linear regression-fitting curve in red is also shown.

635

636 **Figure 3: Inflammation accelerates the onset of SKCM in zebrafish. (A)** Schematic  
637 diagram of the generation of the SKCM model line in zebrafish with *Spint1a* deficiency.  
638 **(B-C)** Representative images **(B)** and number of early oncogenically transformed eGFP-  
639 HRAS-G12V<sup>+</sup> cells in the boxed area **(C)** in *Spint1a*-deficient larvae and control  
640 siblings at 3 dpf. Note the morphological alterations observed in the inflamed skin of

641 the mutants (white arrows). eGFP-HRAS-G12V+ goblet cells are marked with white  
642 arrows. Scale bar 250  $\mu$ m. Each point on the scatter plot represents one larva and the  
643 mean  $\pm$  SEM is also shown. \*\*  $p < 0.05$  according to an unpaired Student *t* test with  
644 Welch's correction. **(D-F)** Impact of Spint1a deficiency on SKCM onset in zebrafish.  
645 Representative images of whole fish **(D)** and of nodular tail tumors **(E)**, and Kaplan-  
646 Meier curve showing the percentage of SKCM-free fish in control and Spint1a-deficient  
647 adult fish **(F)**.  $p < 0.0001$  according to a Log rank Mantel-Cox test.

648

649 **Figure 4: Spint1a deficiency is required at cell autonomous and non-autonomous**  
650 **levels to enhance SKCM cell dissemination in a zebrafish larval allotransplantation**  
651 **model.** Analysis of dissemination of control and Spint1a-deficient SKCM  
652 allotransplants in wild type larvae **(A-D)** and SKCM allotransplants in wild type and  
653 Spint1a-deficient larvae **(E-H)**. **(A, E)** Experimental design. **(B, F)** Representative  
654 images (overlay of bright field and red channels) of SKCM invasion at 5 dpi. Bars: 500  
655  $\mu$ m. **(C, G)** Percentage of invaded larvae for both tumor genotypes. Each dot represents  
656 a single tumor and the mean  $\pm$  SEM is also shown. \*\* $p < 0.01$ , \*\*\* $p < 0.0001$  according  
657 to unpaired Student *t* test. **(D, H)** Number of tumor foci per larva. \*\*\* $p < 0.0001$   
658 according to Chi-square Tests.

659

660 **Figure 5: Spint1a deficiency both in stromal and tumor cell enhances SKCM**  
661 **dissemination in zebrafish larval model.** **(A)** Allotransplant experimental design.  
662 Combinations of Spint1a-deficient tumor and stromal cells from SKCMs were mixed  
663 with wild type tumor and stromal cells. All possible cell combinations were obtained  
664 maintaining the initial ratio. **(B)** Representative images (overlay of bright field and red  
665 channels) of the invasion in wild type recipient larvae at 5 dpi. Bar: 500  $\mu$ m. **(C)**  
666 Number of tumor foci per larva. \*\* $p < 0.01$  according to a Chi-square Test.

667

668 **Figure 6: Spint1a-deficient SKCM shows enhanced aggressiveness in adult**  
669 **zebrafish allotransplantation assays.** **(A)** Experimental workflow of adult  
670 allotransplantation experiments in pre-irradiated adult casper zebrafish. **(B)** Percentage  
671 of engraftment for both control and Spint1a-deficient tumors. Each dot represents a  
672 single SKCM tumor and the mean  $\pm$  SEM is also shown. **(C, D)** Representative images  
673 and average tumor size (pixels) from 1 to 4 weeks post-transplant of primary **(C)** and

674 secondary (**D**) transplants. Each dot corresponds to a recipient-transplanted fish and the  
675 mean  $\pm$  SEM is also shown. (**B-D**) \* $p < 0.05$ , \*\* $p < 0.01$ , \*\*\* $p < 0.001$  according to  
676 unpaired Student *t* test.

677

678 **Figure S1. Spint1a-deficient SKCM shows enhanced aggressiveness in adult**  
679 **zebrafish allotransplantation assays.** Control and Spint1a deficient SKCMs were  
680 disaggregated and 30,000 (**A**), 100,000 (**B**) and 300,000 cells (**C**) were injected  
681 subcutaneously in pre-irradiated adult casper zebrafish. Fish were analyzed for average  
682 tumor size (pixels) from 1 to 4 weeks post-transplant. Representative images and  
683 quantification of the average tumor size are shown. Each dot corresponds to a recipient-  
684 transplanted fish and the mean  $\pm$  SEM is also shown.\* $p < 0.05$ , \*\*\* $p < 0.001$  according to  
685 unpaired Student *t* test.

686

687 **Figure S2. Expression analysis of differentiation melanocyte, EMT, inflammation**  
688 **and immune cell markers in zebrafish SKCM.** The mRNA levels of the genes  
689 encoding the differentiation melanocyte markers *Sox10*, *Mitfa*, *Tyr* and *Dct*, the EMT  
690 markers *Cdh1*, *Slug* and *Mmp9*, the inflammation marker *Il1b*, the neutrophil markers  
691 *Lyz* and *Mpx*, the macrophage marker *Mpeg1*, and the ISGs *B2m*, *Mxb* and *Pkz* were  
692 analyzed by RT-qPCR in control and Spint1a-deficient SKCMs. \* $p < 0.05$ , \*\* $p < 0.01$   
693 according to one-tailed Student *t* test.

694

695



**Figure 1**

**A**

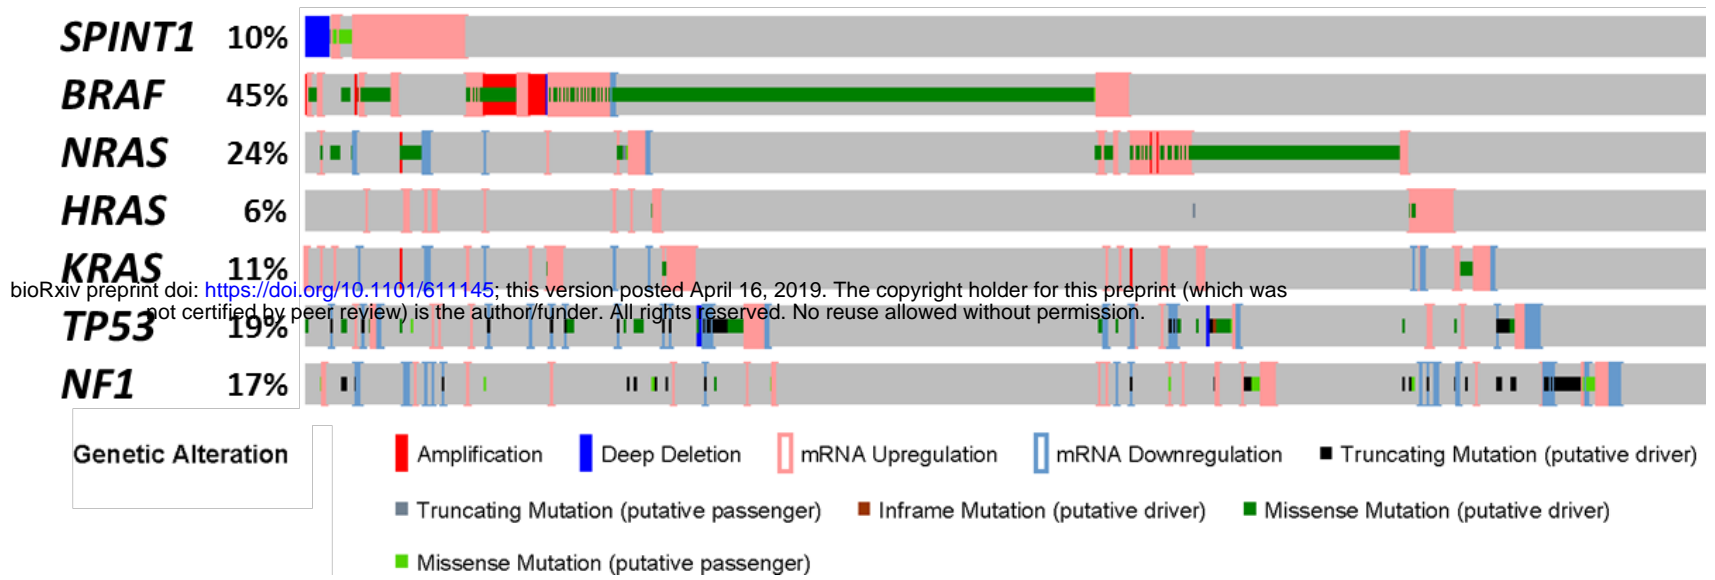

**B**

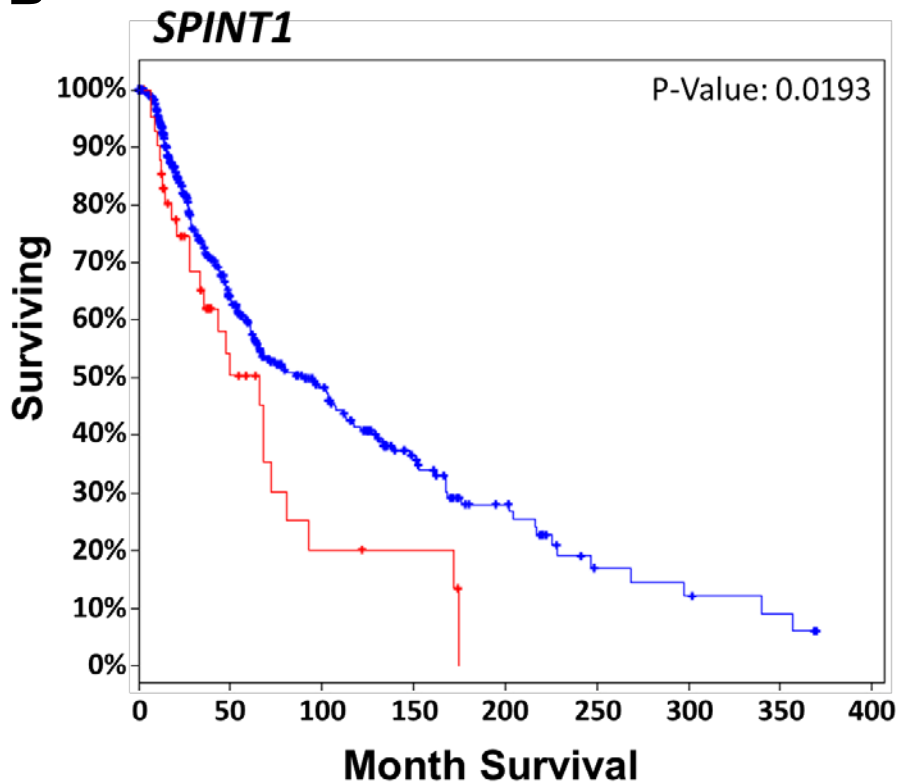

**C**

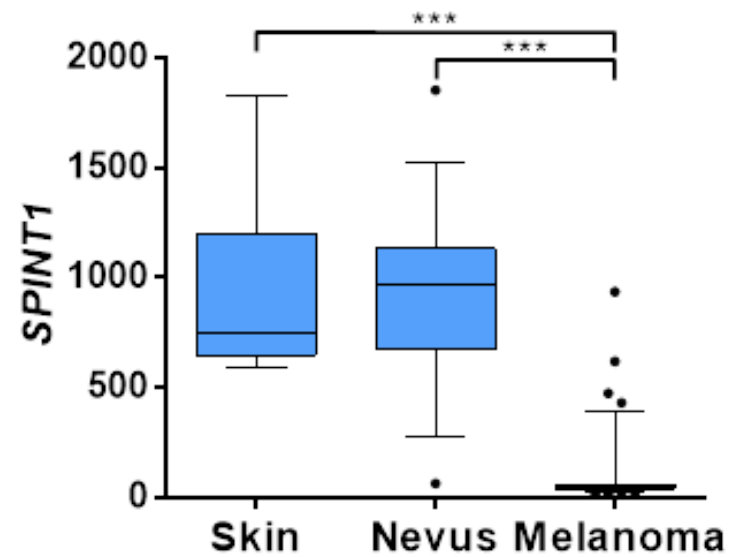

**D**

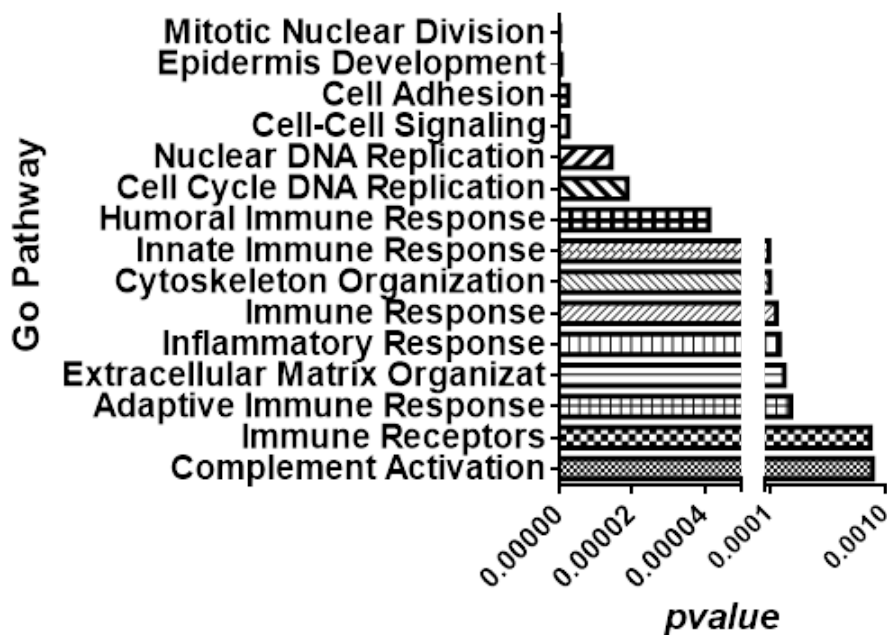

**E**

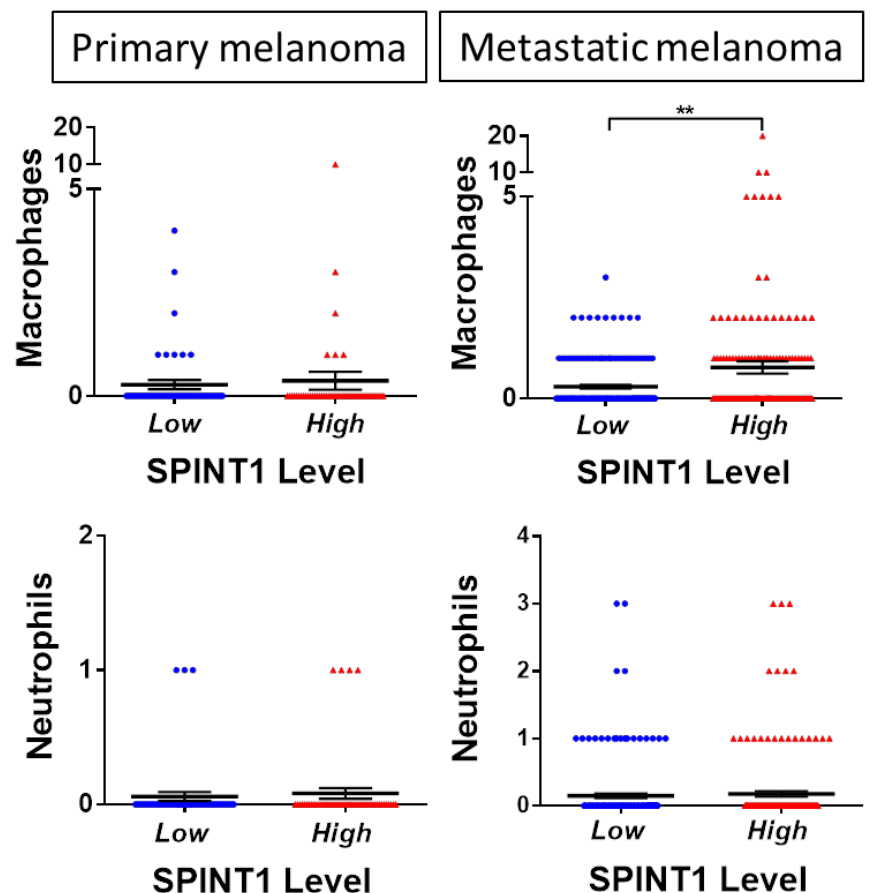

**Figure 2****A**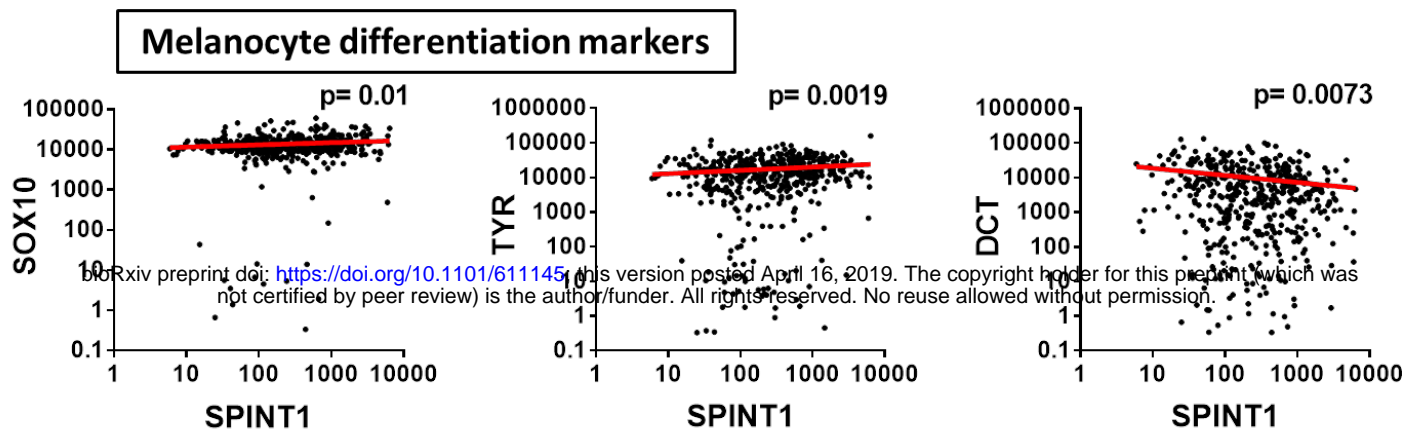**B**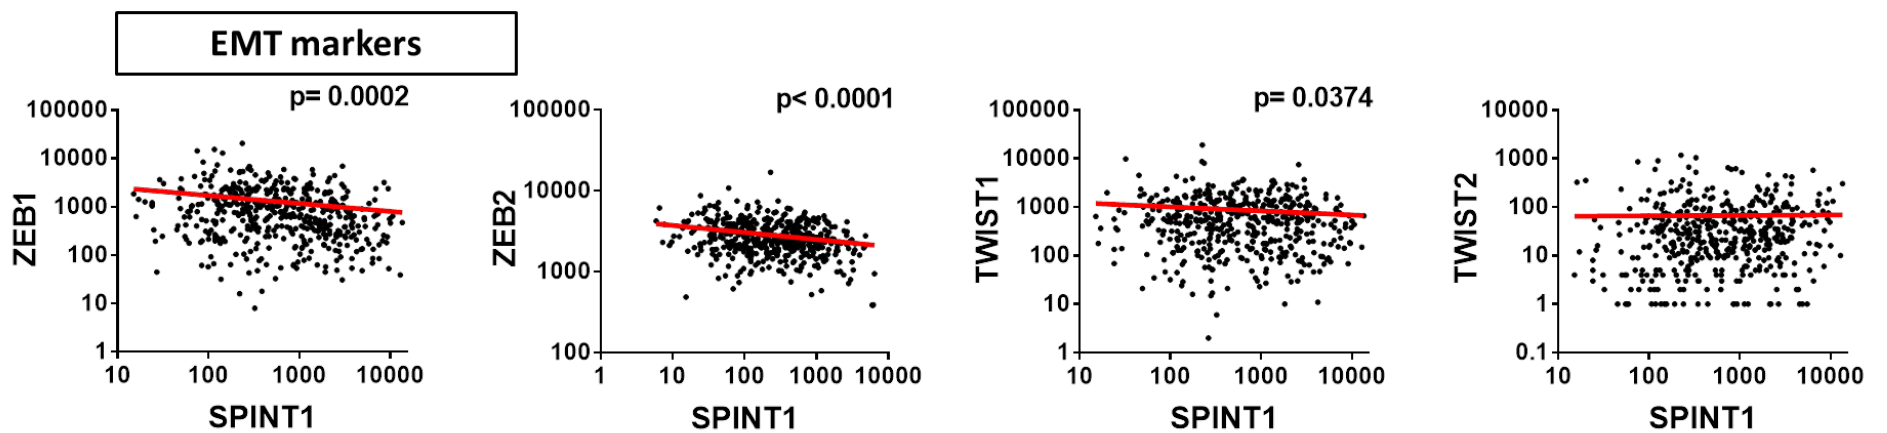**C**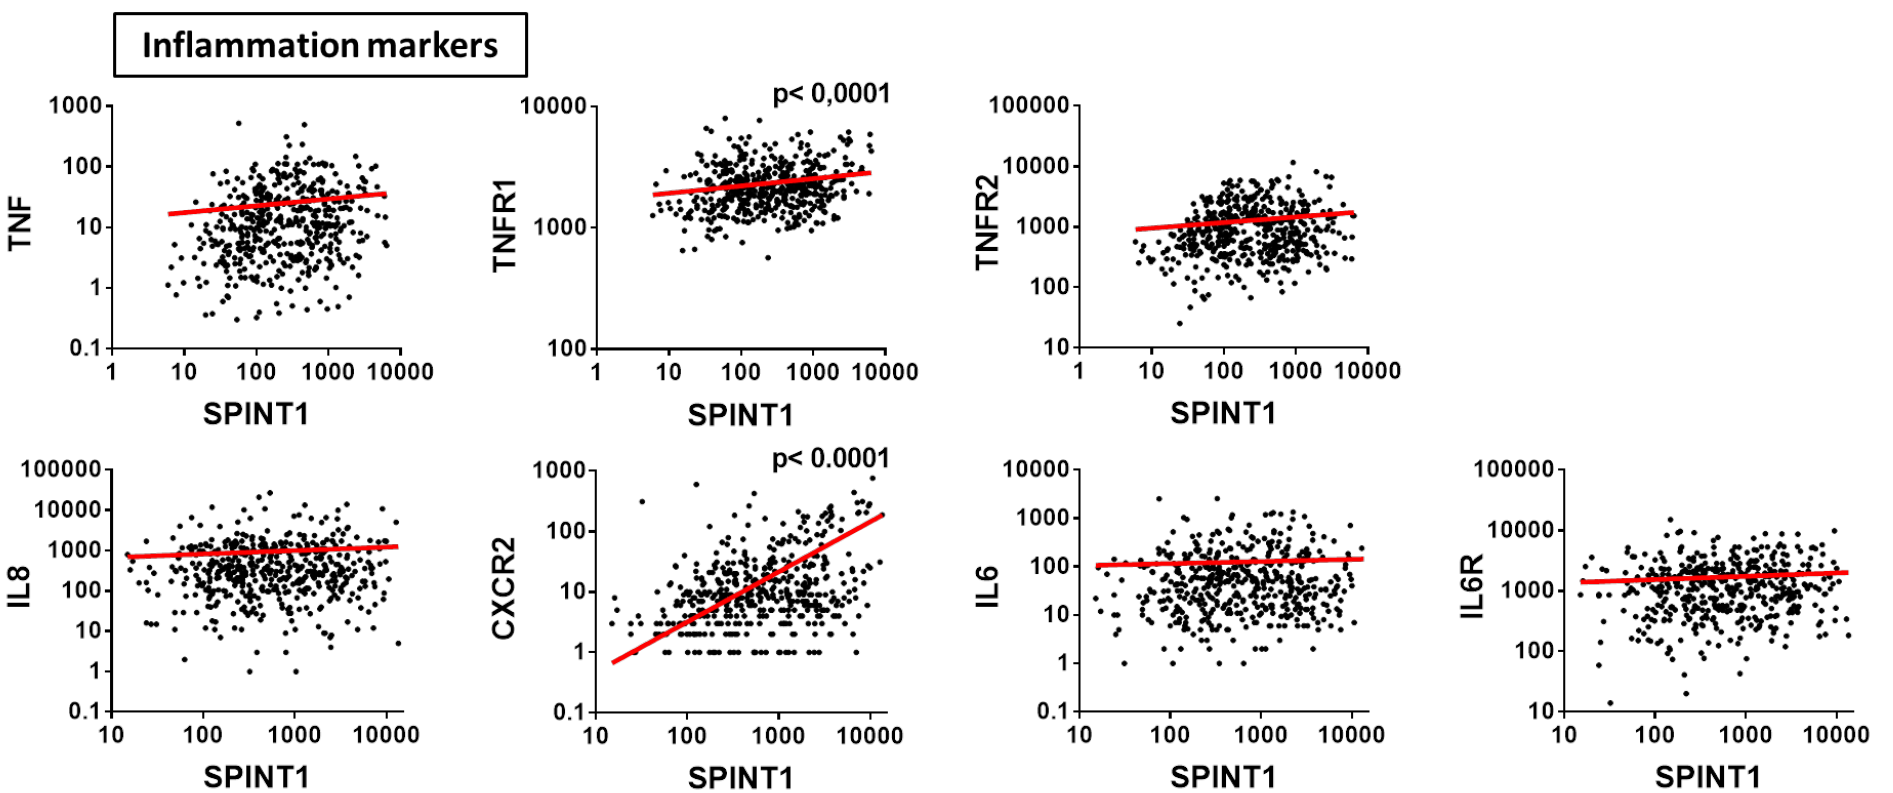**D**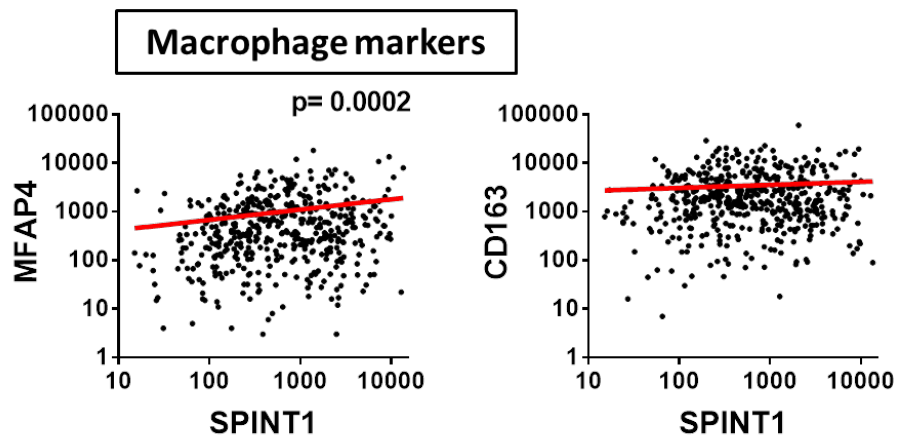**E**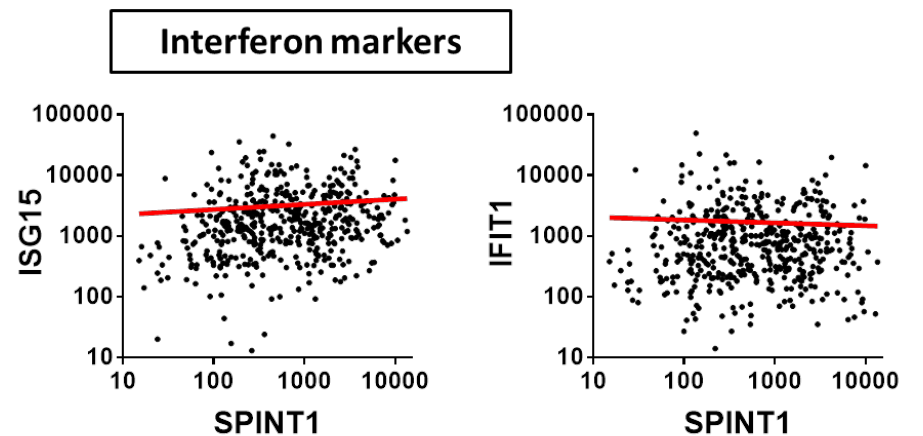

**Figure 3**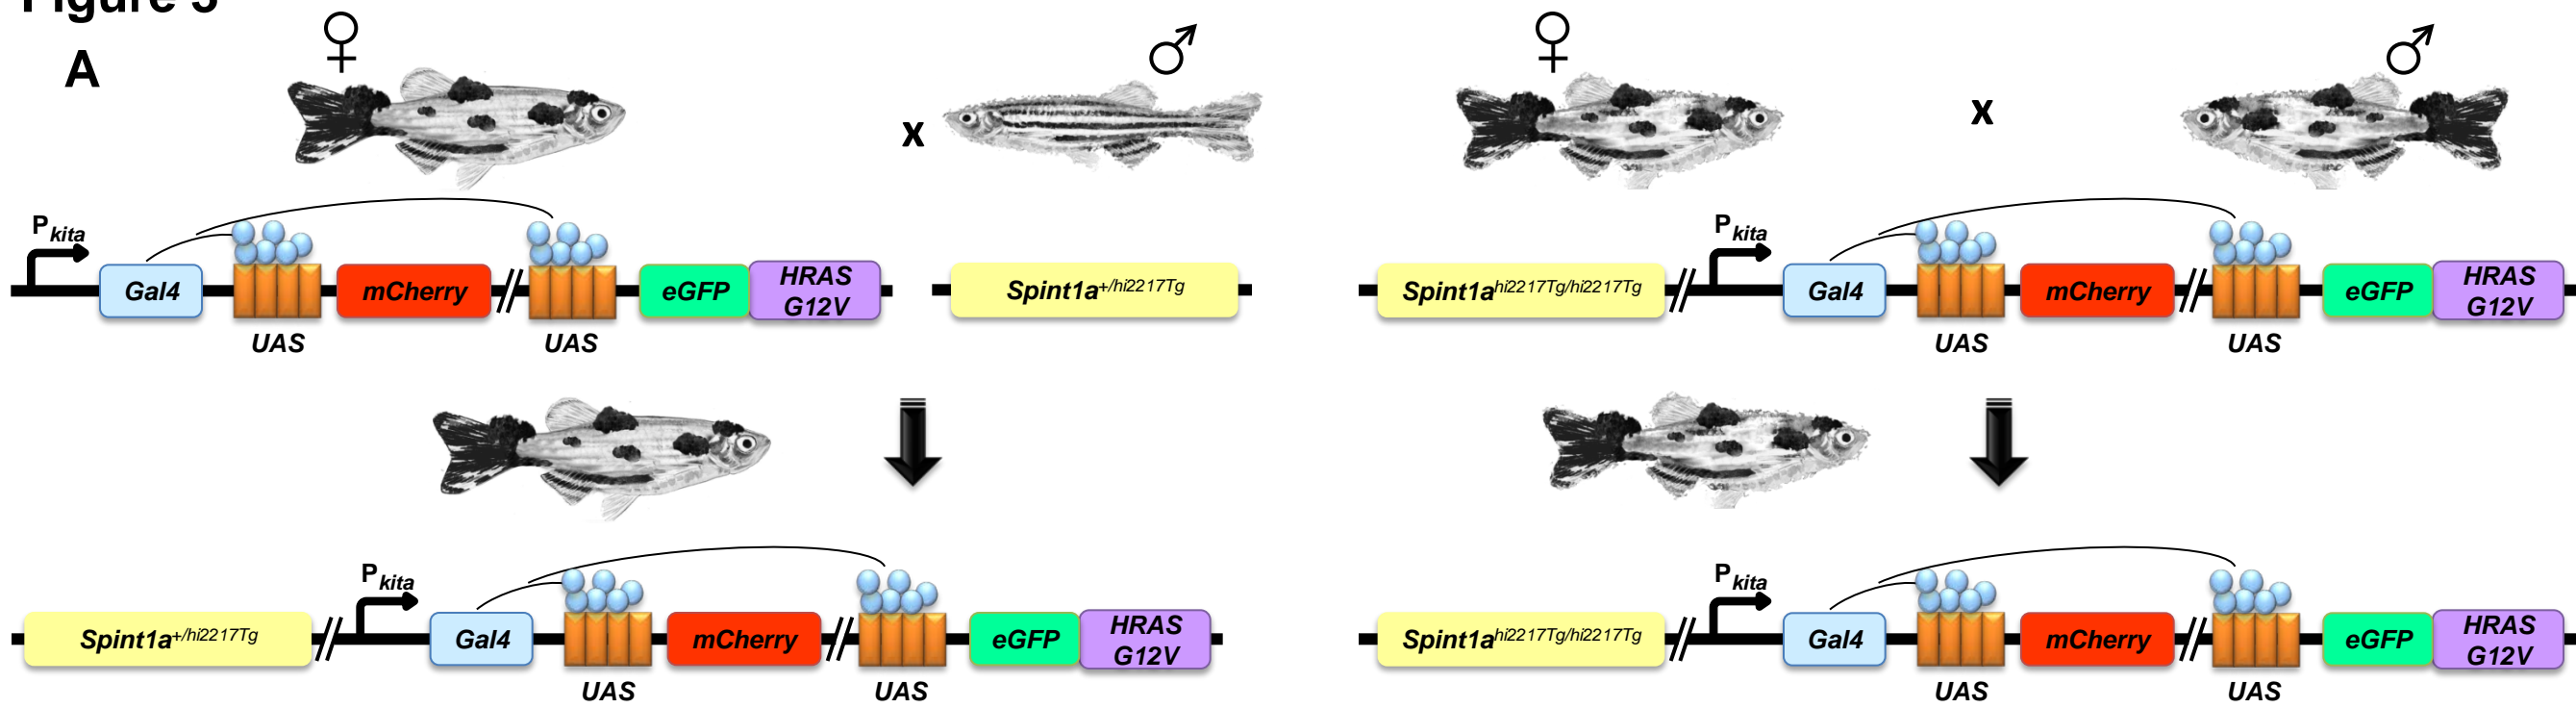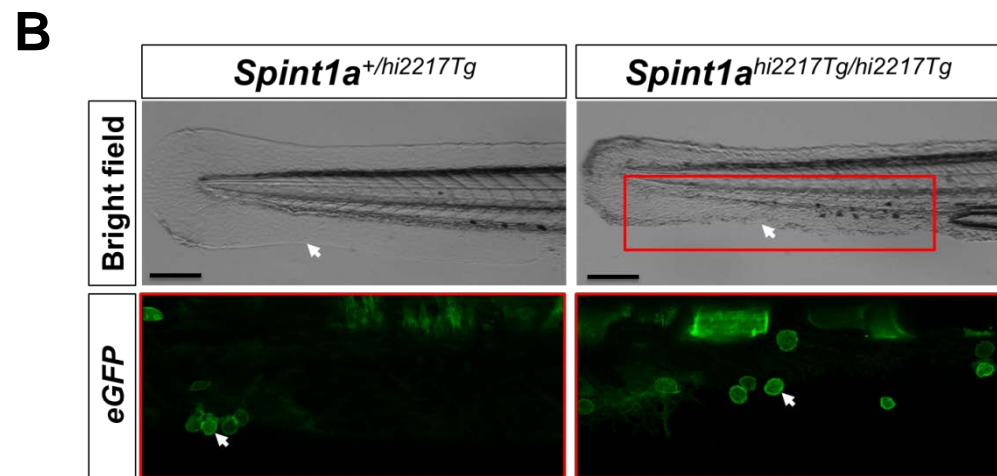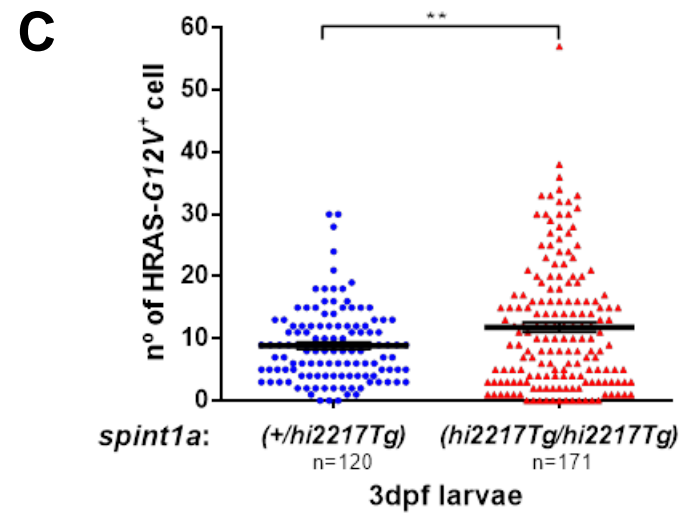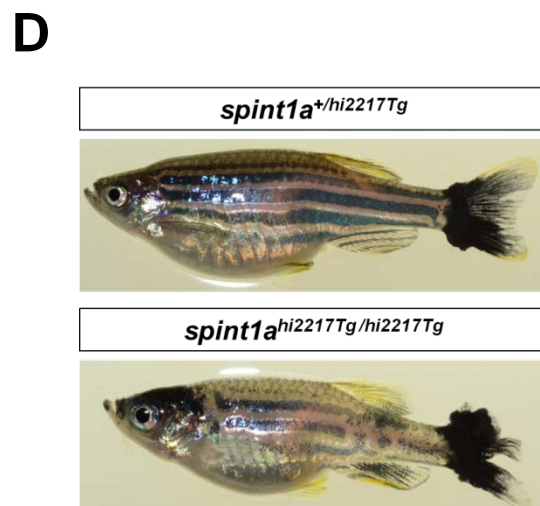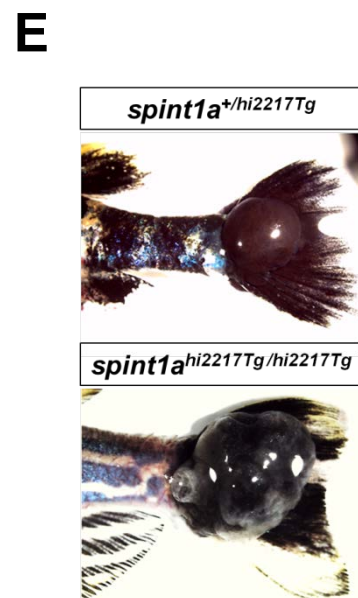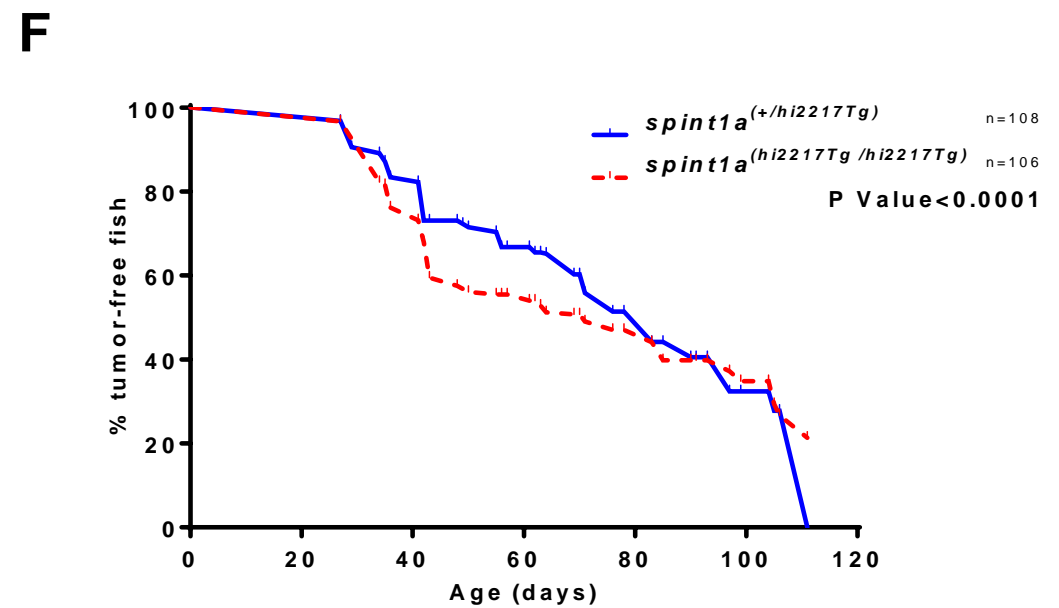



**Figure 4**

**A**

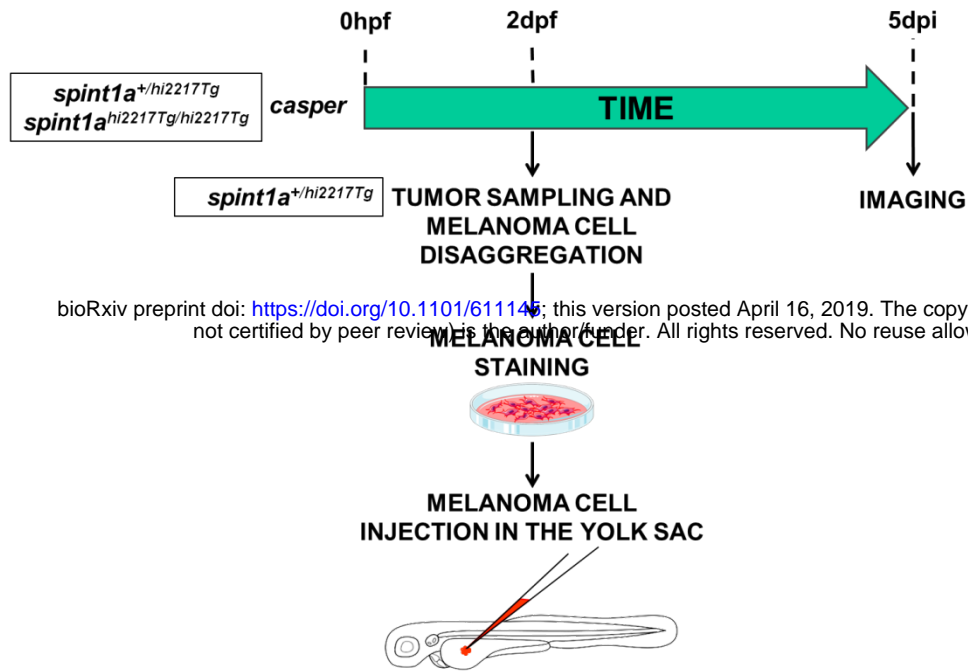

bioRxiv preprint doi: <https://doi.org/10.1101/611149>; this version posted April 16, 2019. The copyright holder for this preprint (which was not certified by peer review) is the author/funder. All rights reserved. No reuse allowed without permission.

**B**

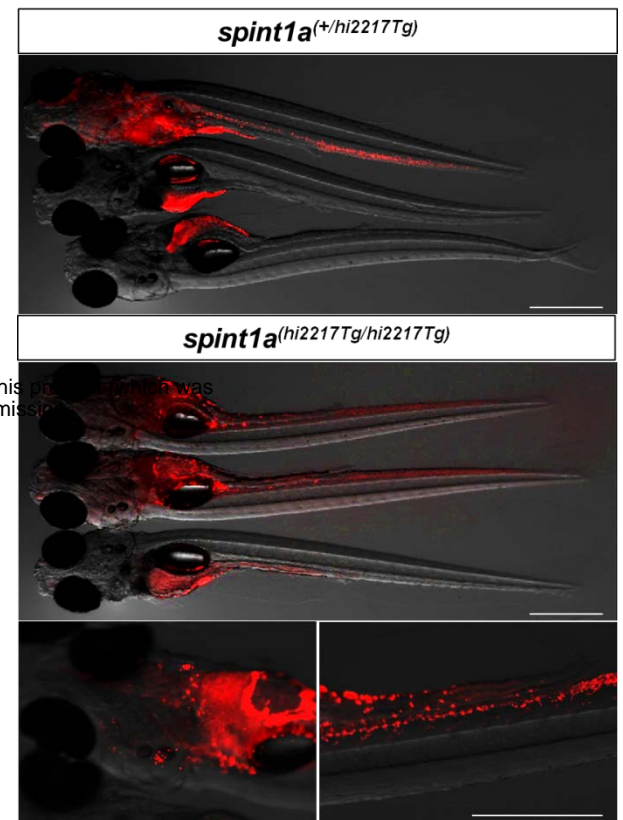

**C**

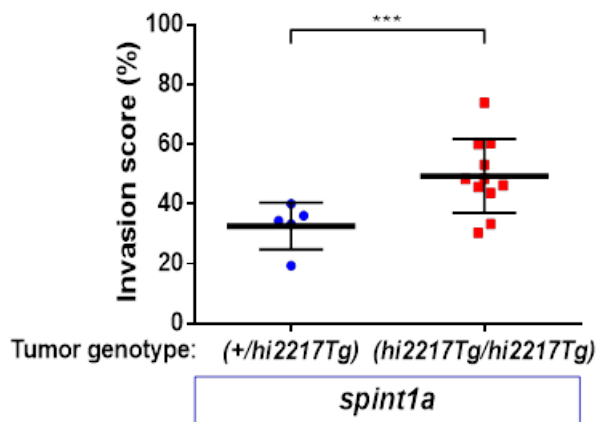

**D**

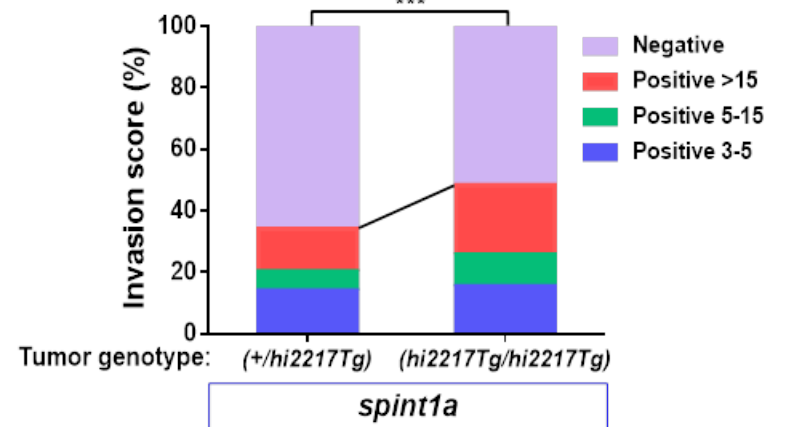

**E**

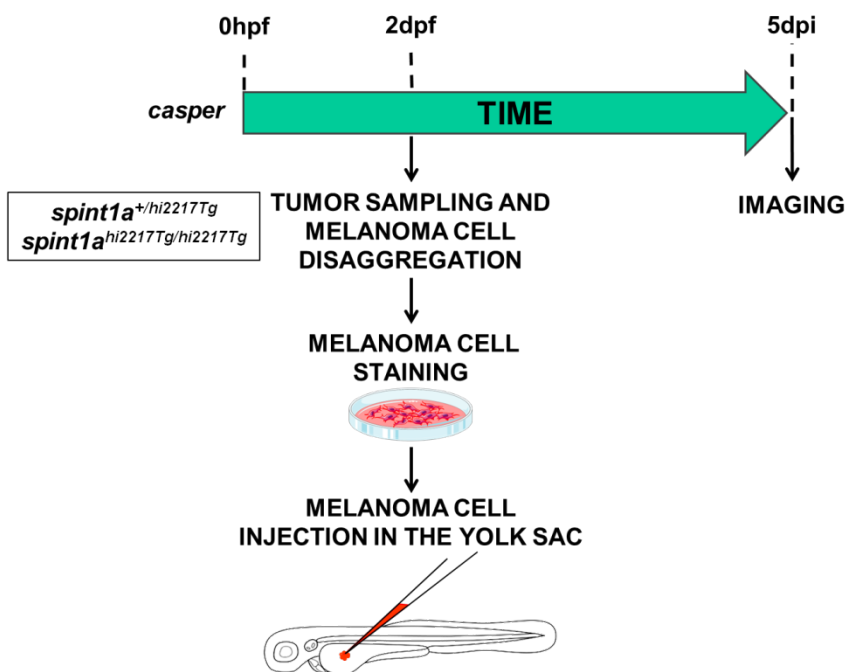

**F**

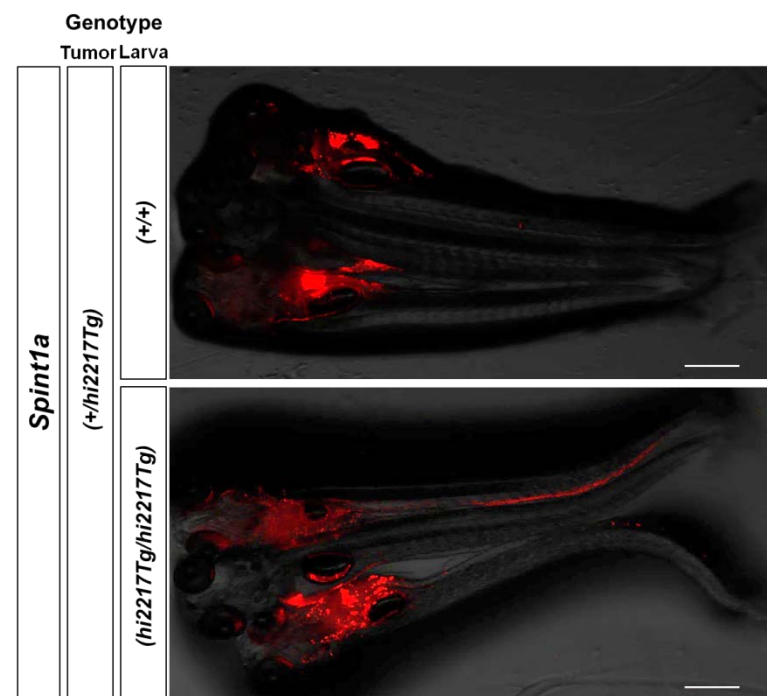

**G**

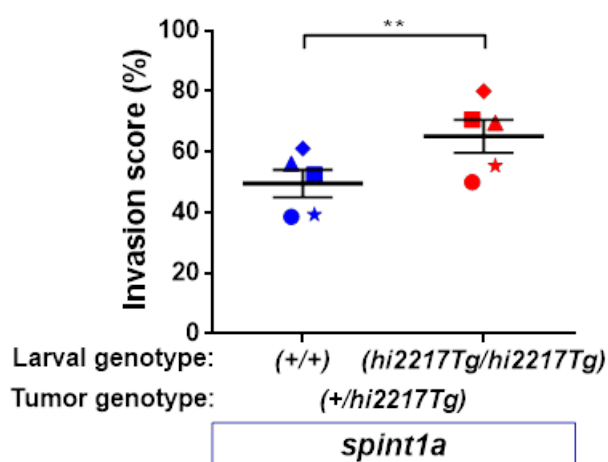

**H**

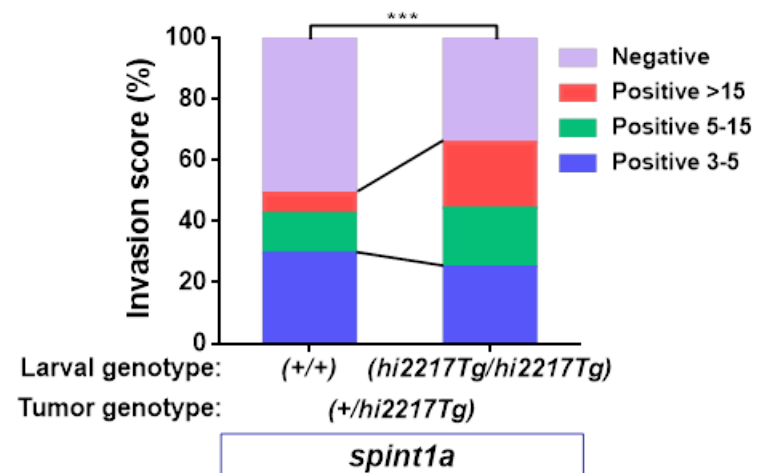

**Figure 5**

**A**

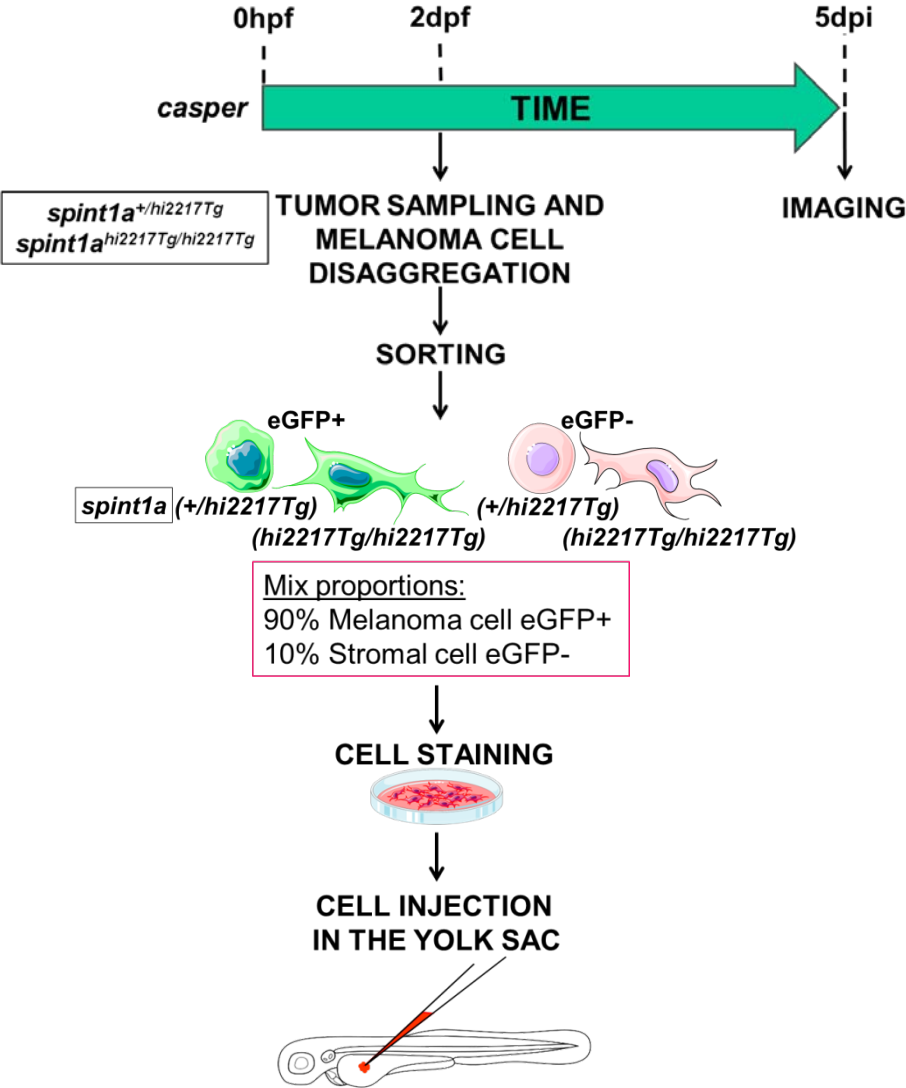

**B**

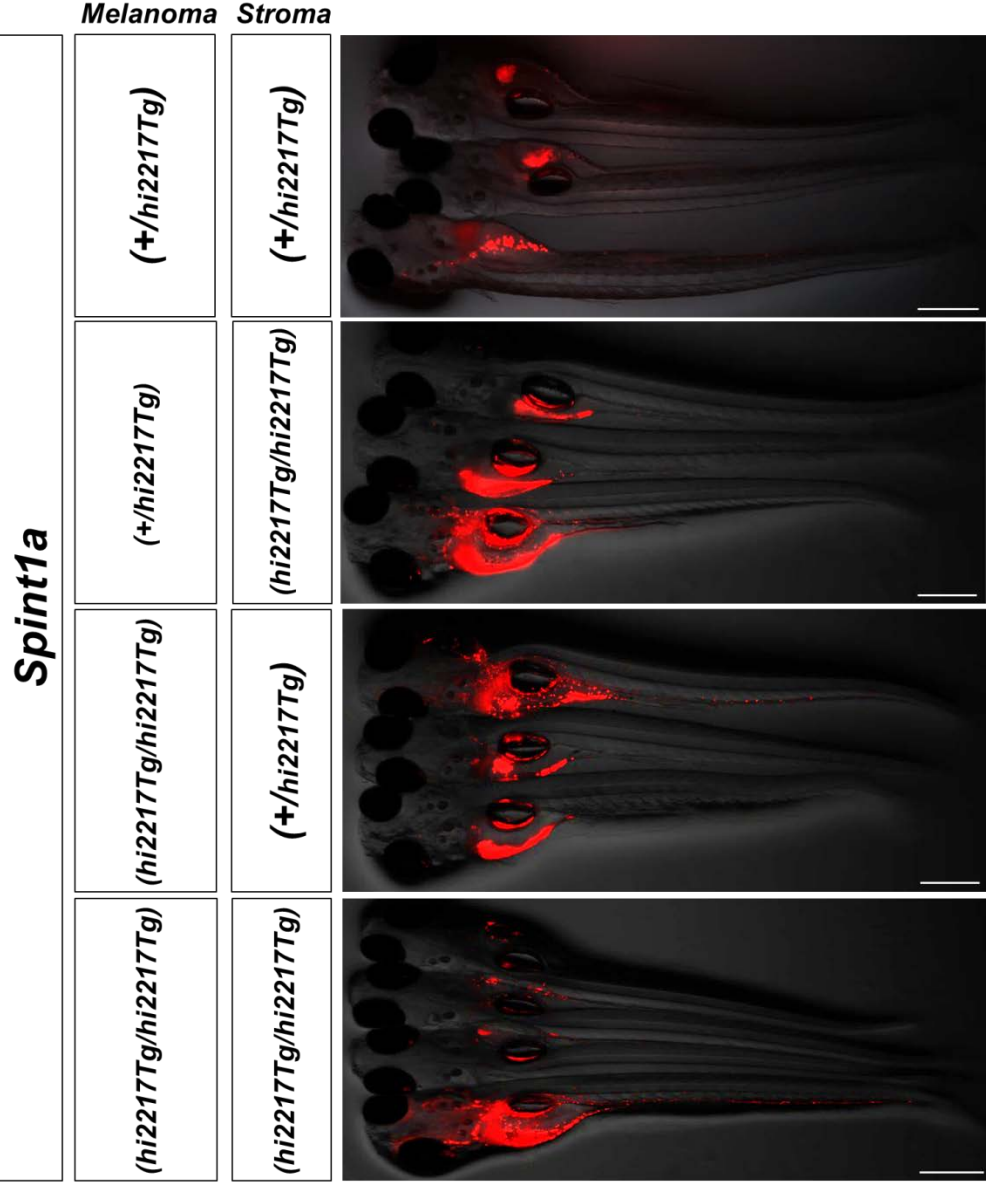

**C**

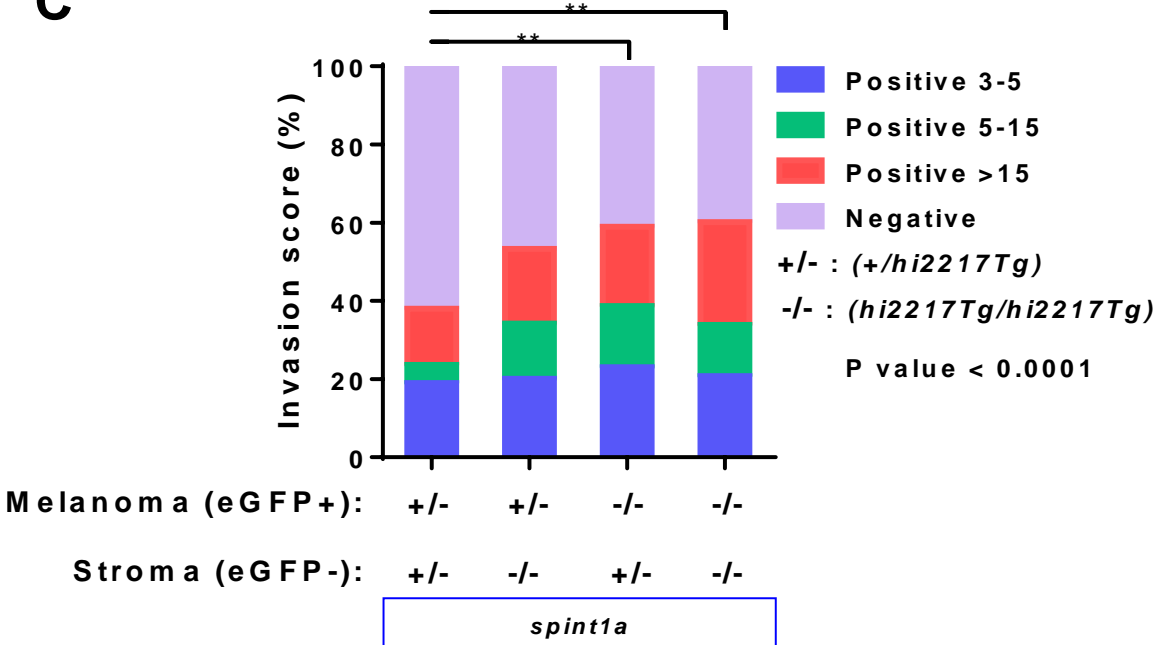

**Figure 6**

**A**

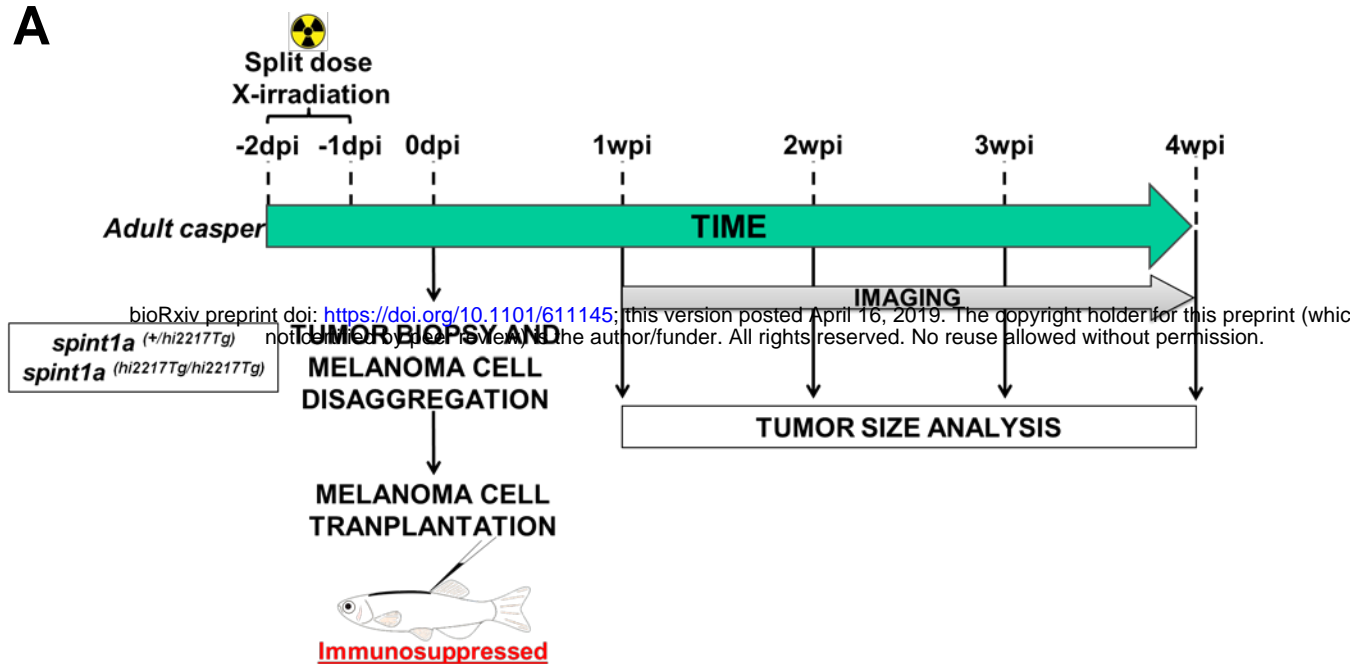

**B**

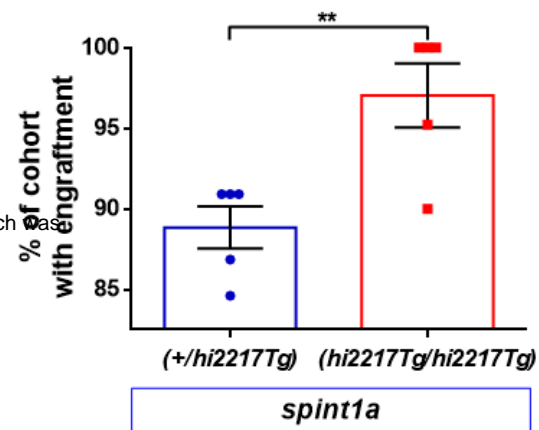

**C**

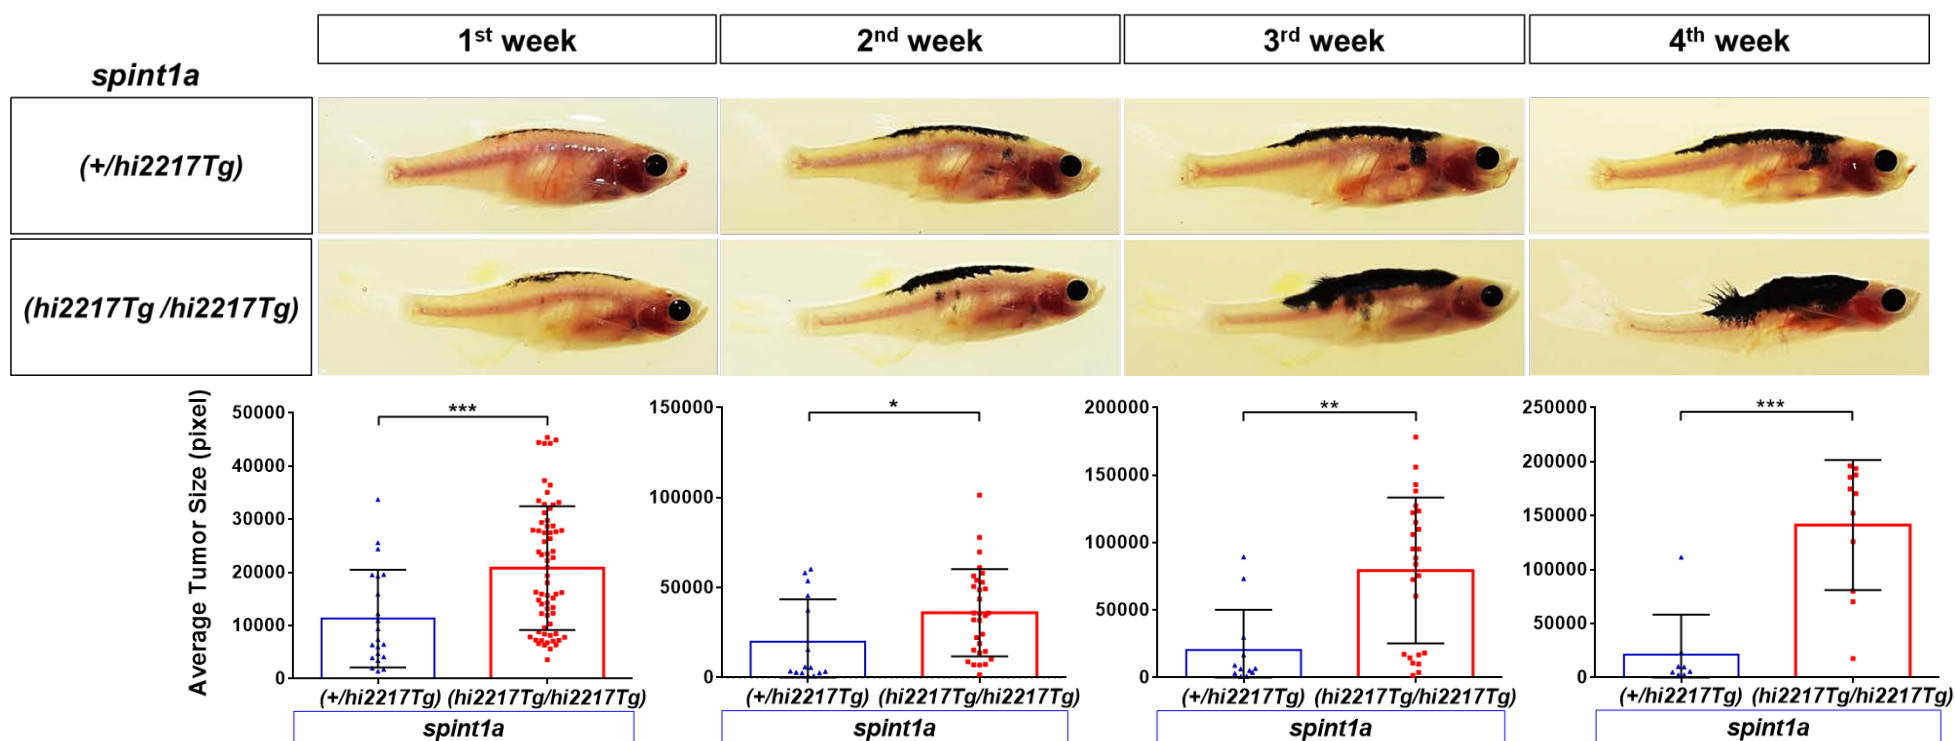

**D**

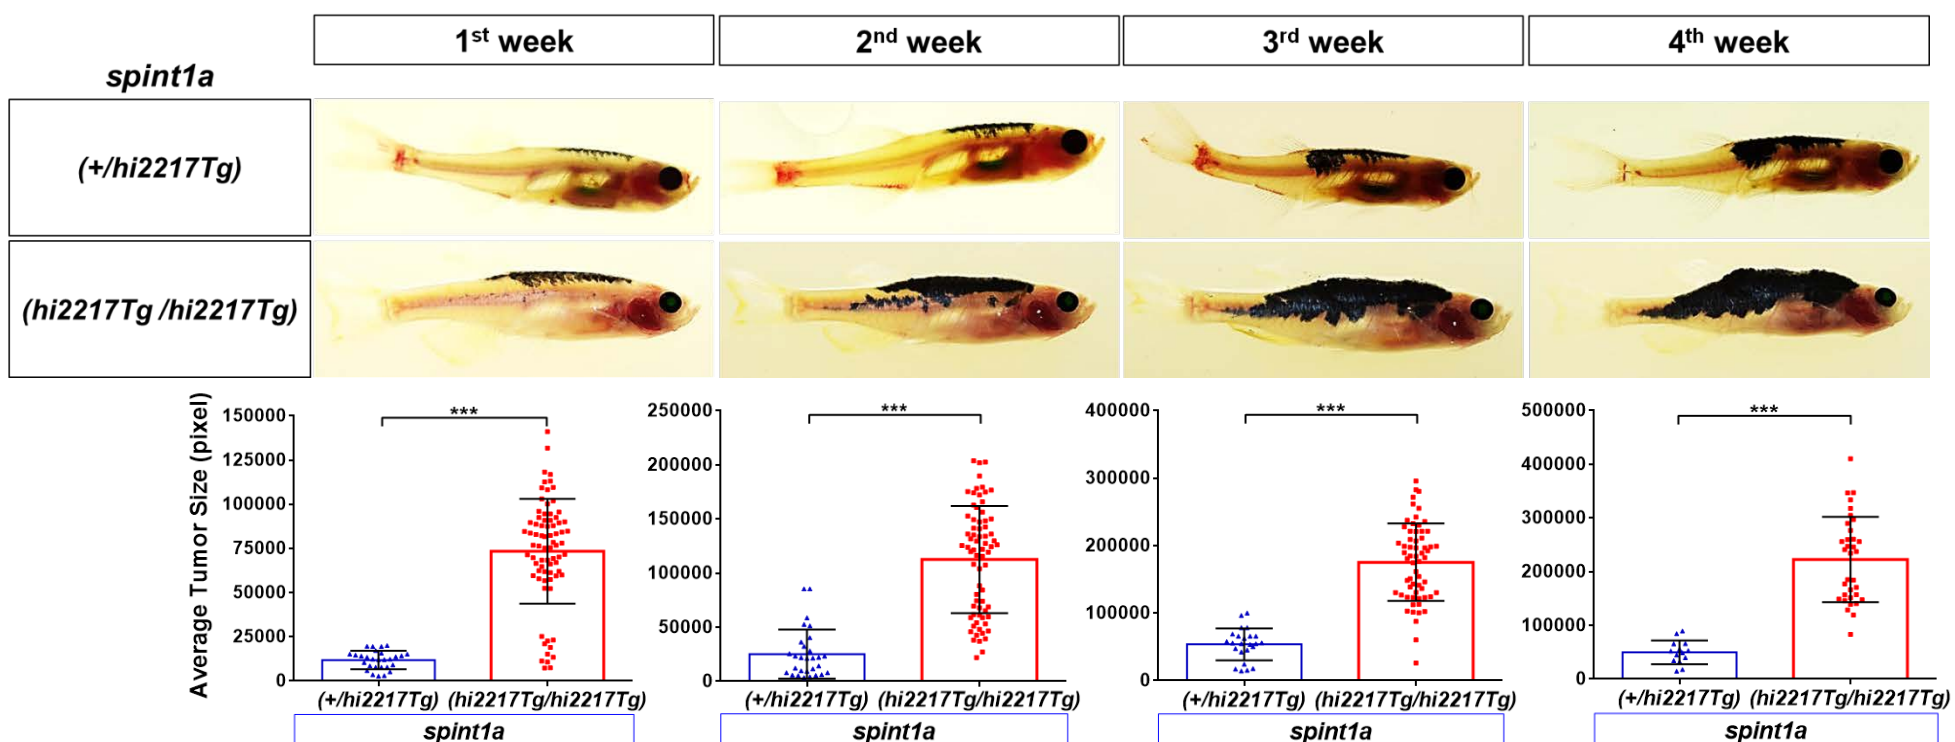



# Figure S1

**A**

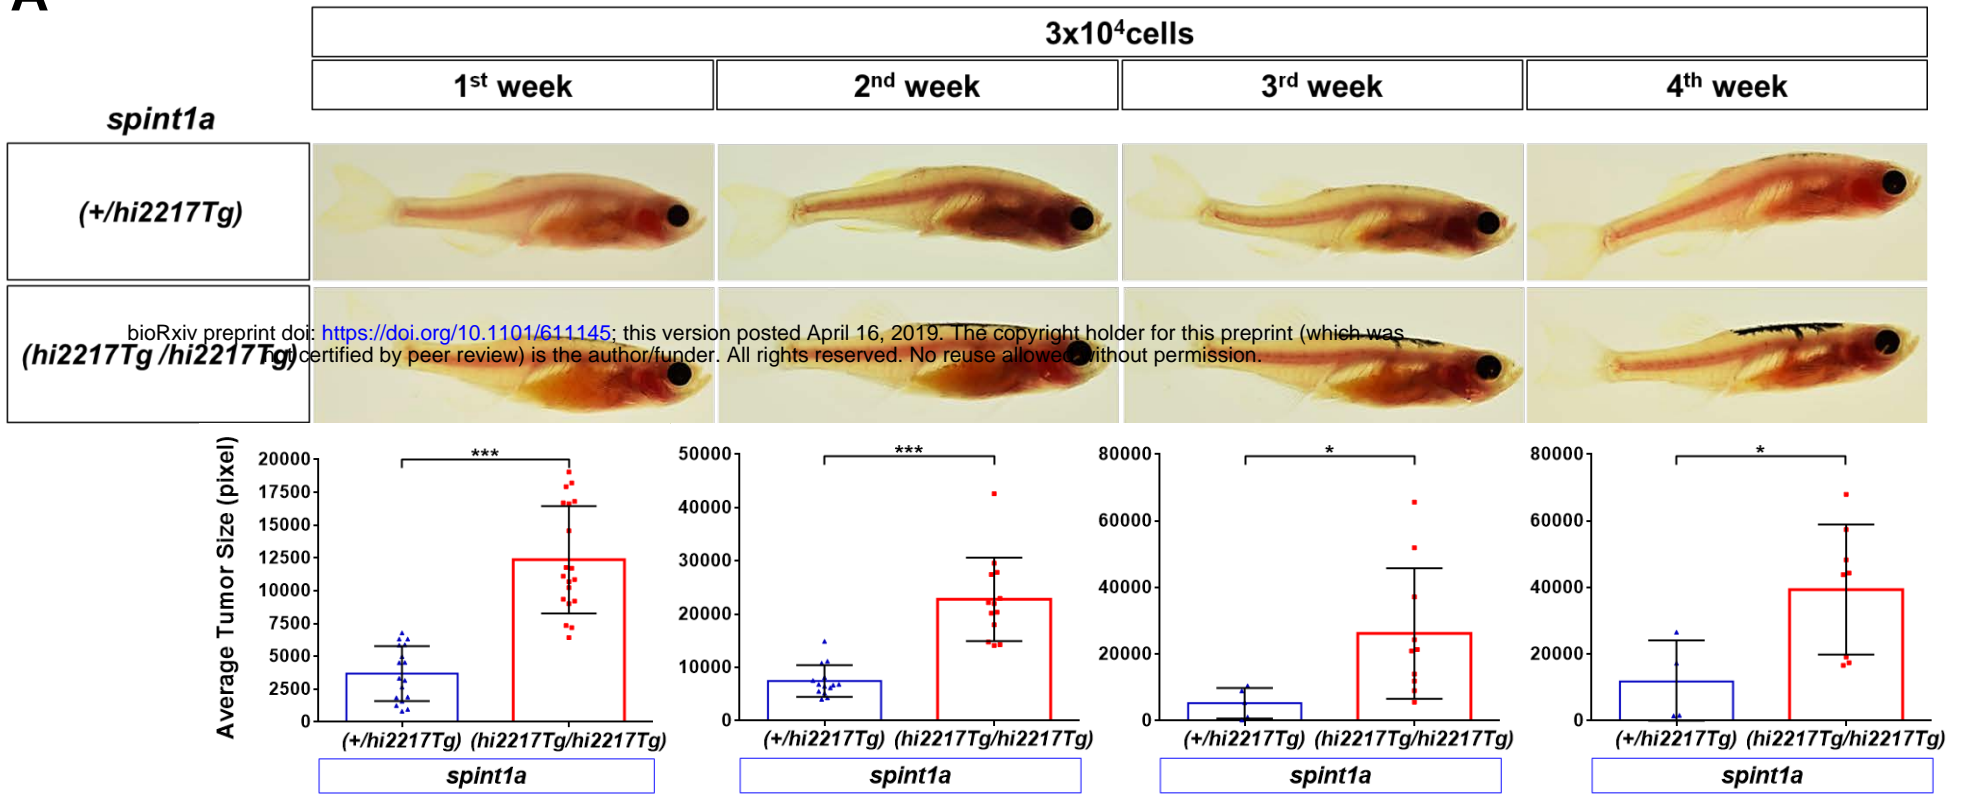

**B**

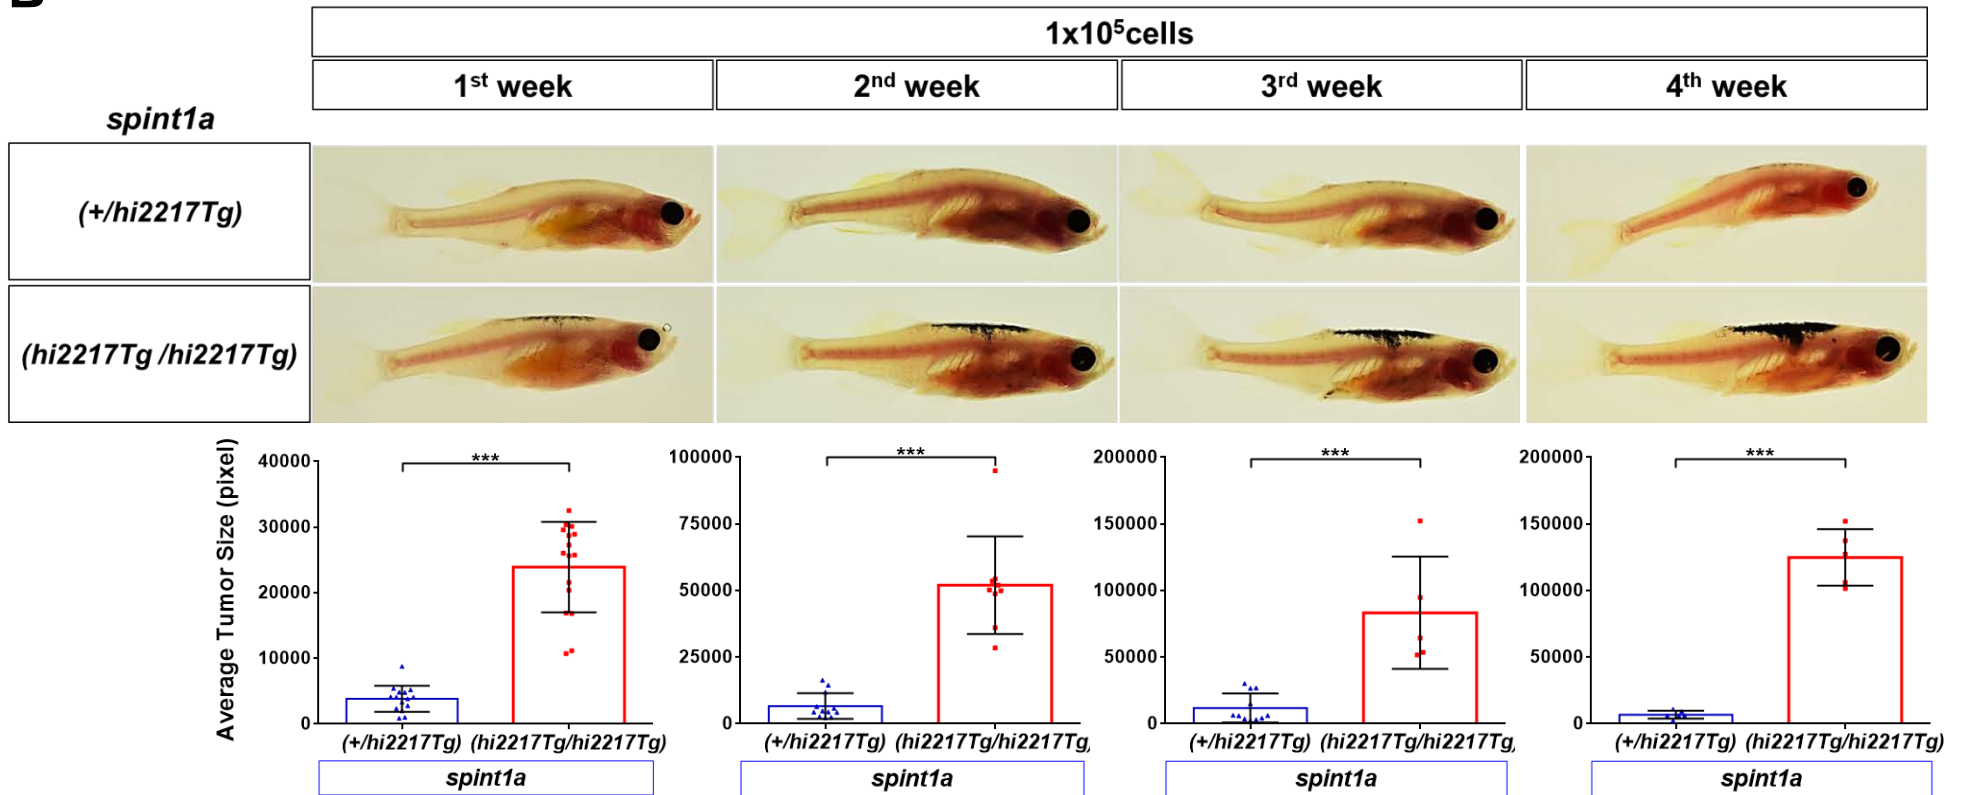

**C**

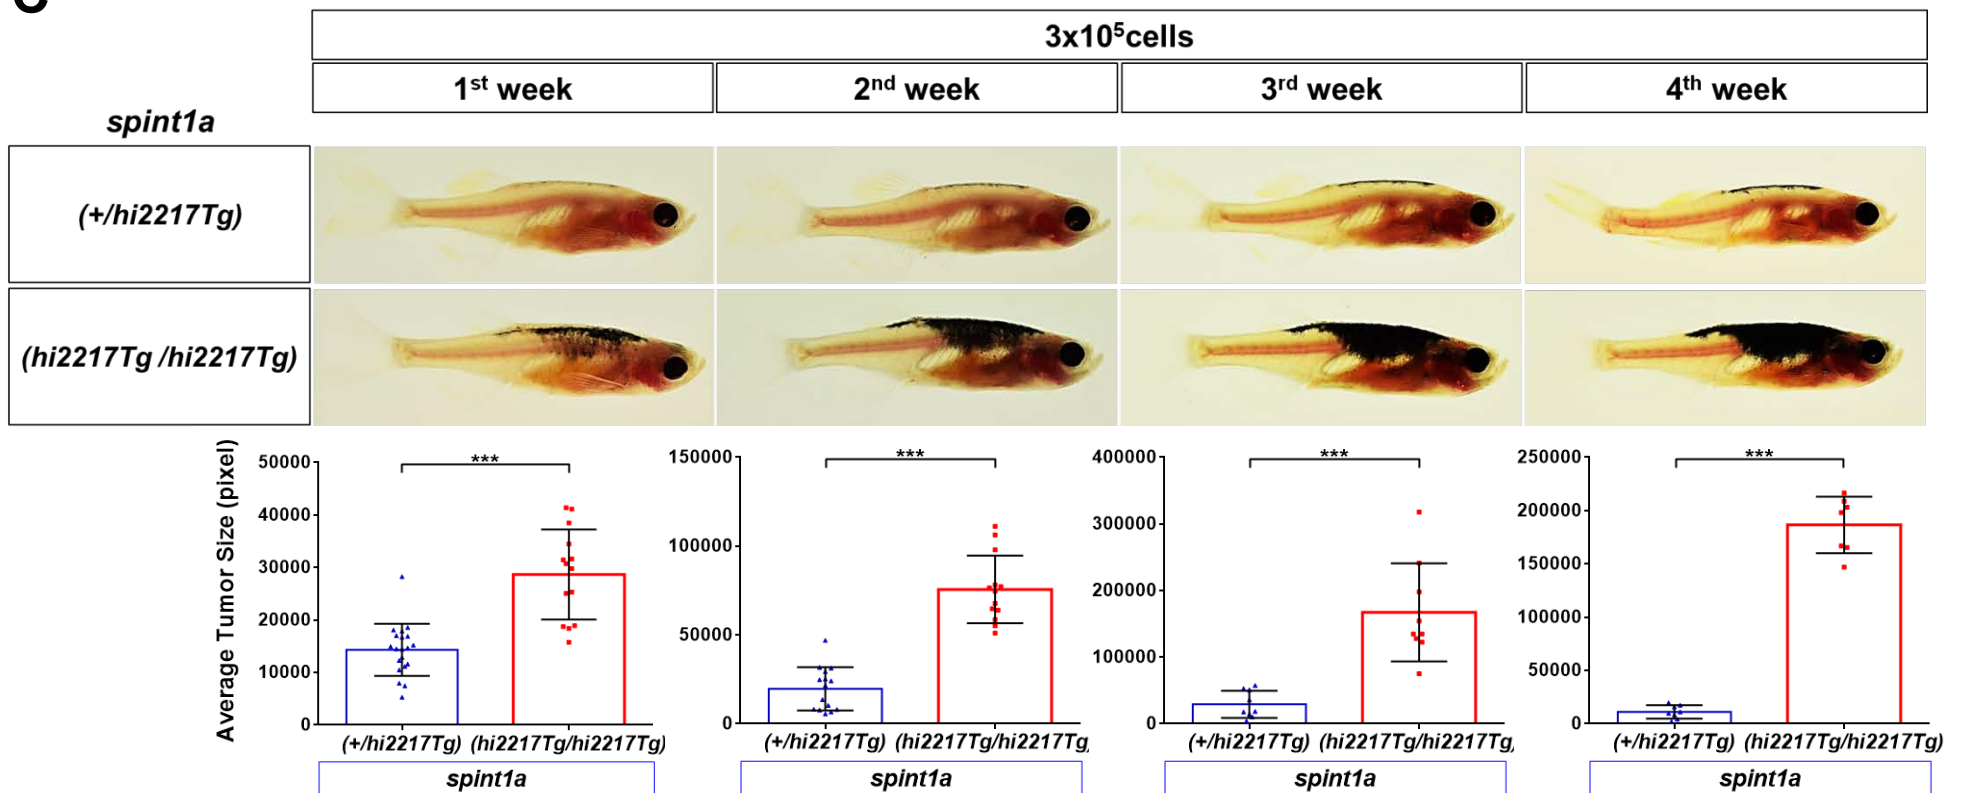



Figure S2

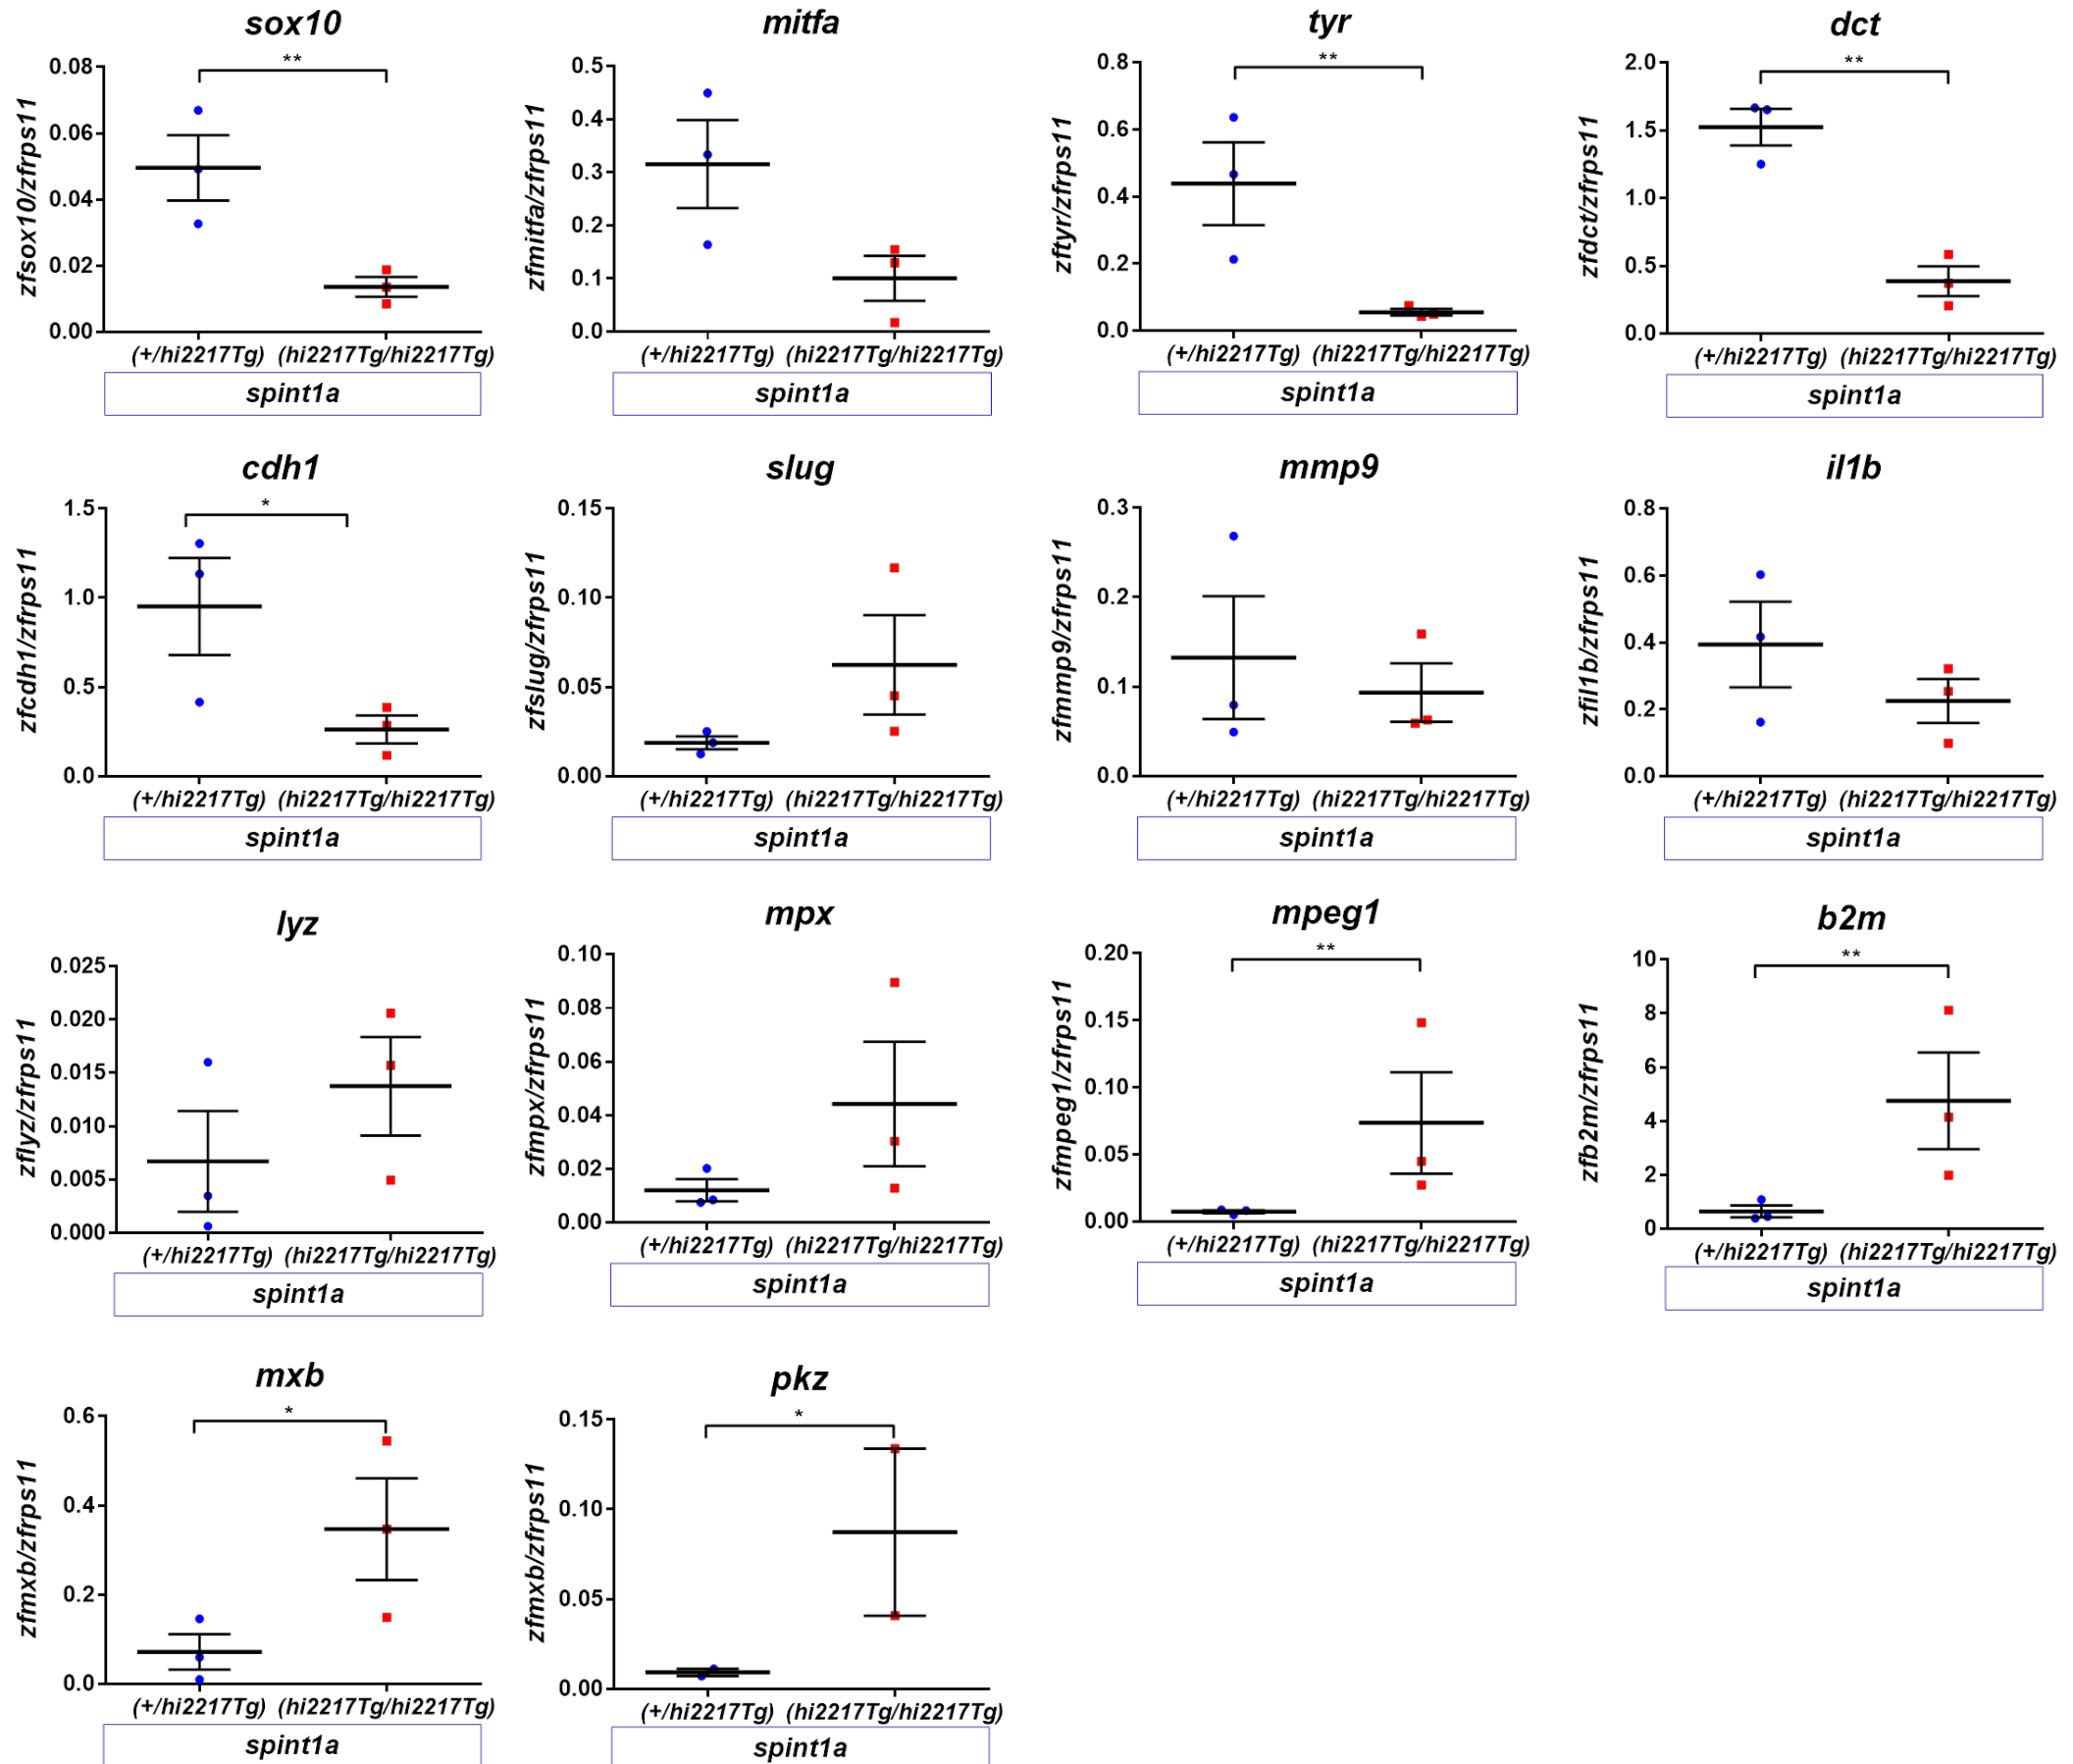

**Table S1.** Primers used in this study for RT-qPCR. The gene symbols followed the Zebrafish Nomenclature Guidelines ([http://zfin.org/zf\\_info/nomen.html/](http://zfin.org/zf_info/nomen.html/)). ENA, European Nucleotide Archive (<http://www.ebi.ac.uk/ena/>).

| Gene         | ENA ID         | Name | Sequence (5'→3')         |
|--------------|----------------|------|--------------------------|
| <i>rps11</i> | NM_213377      | F1   | GGCGTCAACGTGTCAGAGTA     |
|              |                | R1   | GCCTCTTCTCAAAACGGTTG     |
| <i>sox10</i> | NM_131875.1    | F    | CCTCACGCTACAGGTCAGAG     |
|              |                | R    | CGAAGTCGATGTGCGGTTTC     |
| <i>mitfa</i> | NM_001362262.1 | F    | CGACTGGTCAGTTCTTGAC      |
|              |                | R    | AGGTGGGTCTGAACCTGGTA     |
| <i>tyr</i>   | NM_131013.3    | F    | TGTATTCATGAACGGCTCCA     |
|              |                | R    | GATGAAGGGCACCATGAAGT     |
| <i>dct</i>   | NM_131555.2    | F    | TGGACAGTAAACCCTGGGGA     |
|              |                | R    | CCGGCAAAGTTTCCAAAGCA     |
| <i>cdhl</i>  | NM_131820.1    | F    | TGGCAAAGACTAGGCAAAGTGAC  |
|              |                | R    | AAACACCTTGTGGCCCTCAT     |
| <i>slug</i>  | NM_001008581.1 | F1   | AGTCCAACAGTGTTTATTTCTCCA |
|              |                | R1   | GCAGGTTGCTGGTAGTCCAT     |
| <i>mmp9</i>  | NM_213123.1    | F1   | GCTGTCATGAGTTTGGACA      |
|              |                | R1   | AGGGCCAGTTCTAGGTCCAT     |
| <i>il1b</i>  | NM_212844.2    | F5   | GGCTGTGTGTTTGGGAATCT     |
|              |                | R5   | TGATAAACCAACCGGGAACA     |
| <i>lyz</i>   | NM_139180.1    | F    | TGGCAGTGGTGTTTTTGTGT     |
|              |                | R    | TCAAATCCATCAAGCCCTTC     |
| <i>mpx</i>   | NM_212779      | F1   | AGGGCGTGACCATGCTATAC     |
|              |                | R1   | AGGCTCAGCAACACCTCCTA     |
| <i>mpeg1</i> | NM_212737.1    | F    | ACAGCAAAACACCCATCTGGCGA  |
|              |                | R    | TGCGGCACAATCGCAGTCCA     |
| <i>b2m</i>   | NM_001159768.1 | F    | AACCAAACACCCTGATCTGC     |
|              |                | R    | CAACGCTCTTTGTGAGGTGA     |
| <i>mxh</i>   | NM_001128672.1 | F    | AATGGTGATCCGCTATCTGC     |
|              |                | R    | TCTGGCGGCTCAGTAAGTTT     |
| <i>pkz</i>   | NM_001040376.2 | F1   | GGAGCACCGTACAGGACATT     |
|              |                | R1   | CTCGGGCTTTATTTGCTCTG     |
